# Supplementary material for: PCAtest: testing the statistical significance of Principal Component Analysis in R
Source: PeerJ. 2022 Feb 17;10:e12967. doi: 10.7717/peerj.12967 (PMC8858582; doi:10.7717/peerj.12967)
Supplement: Supplemental Information 1 — Observed Psi and Phi values, and eigenvalues obtained from the PCAtest analysis of 100 replicate datasets generated without correlation among five variables and 100 observations. Significant values based on permutation test are indicated with asterisks (P < 0.05). % = percentage of explained variance accounted for the first PC axis. [file peerj-10-12967-s001.xlsx]

## Sheet: Hoja1
Replicate	Psi	Phi	Eigen 1	Eigen 2	Eigen 3	Eigen 4	Eigen 5	%
1	0.2168	0.1041	–	–	–	–	–	–
2	0.2018	0.1005	–	–	–	–	–	–
3	0.208	0.102	–	–	–	–	–	–
4	0.2961	0.1217	–	–	–	–	–	–
5	0.1203	0.0776	–	–	–	–	–	–
6	0.23	0.1072	–	–	–	–	–	–
7	0.3673*	0.1355*	1.4481*	1.05438	1.03304	0.83002	0.63447	29
8	0.1801	0.0949	–	–	–	–	–	–
9	0.1116	0.0747	–	–	–	–	–	–
10	0.1329	0.0815	–	–	–	–	–	–
11	0.2136	0.1033	–	–	–	–	–	–
12	0.0602	0.0549	–	–	–	–	–	–
13	0.3199	0.1265	–	–	–	–	–	–
14	0.206	0.1015	–	–	–	–	–	–
15	0.1274	0.0798	–	–	–	–	–	–
16	0.2963	0.1217	–	–	–	–	–	–
17	0.3499	0.1323	–	–	–	–	–	–
18	0.1453	0.0852	–	–	–	–	–	–
19	0.1157	0.0761	–	–	–	–	–	–
20	0.4326*	0.1471*	1.3795*	1.29335	0.95037	0.74293	0.63389	27.6
21	0.1502	0.0866	–	–	–	–	–	–
22	0.166	0.0911	–	–	–	–	–	–
23	0.2408	0.1097	–	–	–	–	–	–
24	0.1741	0.0933	–	–	–	–	–	–
25	0.0676	0.0581	–	–	–	–	–	–
26	0.1113	0.0746	–	–	–	–	–	–
27	0.1196	0.0773	–	–	–	–	–	–
28	0.1317	0.0811	–	–	–	–	–	–
29	0.1971	0.0993	–	–	–	–	–	–
30	0.2007	0.1002	–	–	–	–	–	–
31	0.1298	0.0806	–	–	–	–	–	–
32	0.1484	0.0861	–	–	–	–	–	–
33	0.197	0.0992	–	–	–	–	–	–
34	0.1469	0.0857	–	–	–	–	–	–
35	0.2716	0.1165	–	–	–	–	–	–
36	0.2259	0.1063	–	–	–	–	–	–
37	0.0673	0.058	–	–	–	–	–	–
38	0.1039	0.0721	–	–	–	–	–	–
39	0.2227	0.1055	–	–	–	–	–	–
40	0.0707	0.0595	–	–	–	–	–	–
41	0.1233	0.0785	–	–	–	–	–	–
42	0.3381	0.13	–	–	–	–	–	–
43	0.1787	0.0945	–	–	–	–	–	–
44	0.1075	0.0733	–	–	–	–	–	–
45	0.149	0.0863	–	–	–	–	–	–
46	0.1968	0.0992	–	–	–	–	–	–
47	0.2933	0.1211	–	–	–	–	–	–
48	0.4056*	0.1424*	1.4691*	1.07199	0.96187	0.91041	0.58663	29.4
49	0.2022	0.1006	–	–	–	–	–	–
50	0.2155	0.1038	–	–	–	–	–	–
51	0.117	0.0765	–	–	–	–	–	–
52	0.1327	0.0814	–	–	–	–	–	–
53	0.2795	0.1182	–	–	–	–	–	–
54	0.4137*	0.1438*	1.4777*	1.15883	0.90995	0.76474	0.68878	29.6
55	0.2357	0.1085	–	–	–	–	–	–
56	0.1239	0.0787	–	–	–	–	–	–
57	0.1357	0.0824	–	–	–	–	–	–
58	0.2874	0.1199	–	–	–	–	–	–
59	0.1882	0.097	–	–	–	–	–	–
60	0.0527	0.0513	–	–	–	–	–	–
61	0.108	0.0735	–	–	–	–	–	–
62	0.1578	0.0888	–	–	–	–	–	–
63	0.1973	0.0993	–	–	–	–	–	–
64	0.1387	0.0833	–	–	–	–	–	–
65	0.3444	0.1312	–	–	–	–	–	–
66	0.154	0.0877	–	–	–	–	–	–
67	0.3192	0.1263	–	–	–	–	–	–
68	0.1248	0.079	–	–	–	–	–	–
69	0.1248	0.079	–	–	–	–	–	–
70	0.1375	0.0829	–	–	–	–	–	–
71	0.1872	0.0968	–	–	–	–	–	–
72	0.2988	0.1222	–	–	–	–	–	–
73	0.0745	0.061	–	–	–	–	–	–
74	0.1427	0.0845	–	–	–	–	–	–
75	0.0639	0.0565	–	–	–	–	–	–
76	0.0374	0.0432	–	–	–	–	–	–
77	0.1897	0.0974	–	–	–	–	–	–
78	0.1115	0.0747	–	–	–	–	–	–
79	0.2449	0.1107	–	–	–	–	–	–
80	0.1656	0.091	–	–	–	–	–	–
81	0.0843	0.0649	–	–	–	–	–	–
82	0.0799	0.0632	–	–	–	–	–	–
83	0.1825	0.0955	–	–	–	–	–	–
84	0.3894*	0.1395*	1.3898*	1.24646	0.91886	0.81214	0.63276	27.8
85	0.3392	0.1302	–	–	–	–	–	–
86	0.1926	0.0981	–	–	–	–	–	–
87	0.2471	0.1111	–	–	–	–	–	–
88	0.1185	0.077	–	–	–	–	–	–
89	0.1585	0.089	–	–	–	–	–	–
90	0.1228	0.0783	–	–	–	–	–	–
91	0.2247	0.106	–	–	–	–	–	–
92	0.2243	0.1059	–	–	–	–	–	–
93	0.3093	0.1244	–	–	–	–	–	–
94	0.1529	0.0874	–	–	–	–	–	–
95	0.1272	0.0797	–	–	–	–	–	–
96	0.3602	0.1342	–	–	–	–	–	–
97	0.2473	0.1112	–	–	–	–	–	–
98	0.2395	0.1094	–	–	–	–	–	–
99	0.2261	0.1063	–	–	–	–	–	–
100	0.1668	0.0913	–	–	–	–	–	–
