# Supplementary material for: PCAtest: testing the statistical significance of Principal Component Analysis in R
Source: PeerJ. 2022 Feb 17;10:e12967. doi: 10.7717/peerj.12967 (PMC8858582; doi:10.7717/peerj.12967)
Supplement: Supplemental Information 2 — Observed Psi and Phi values, and eigenvalues obtained from the PCAtest analysis of 100 replicate datasets generated with correlation (r = 0.25) among five variables and 100 observations. Significant values based on permutation test are indicated with asterisks (* = P < 0.05, ** = P < 0.01). % = percentage of explained variance accounted for the significant PCs only. [file peerj-10-12967-s002.xlsx]

## Sheet: Hoja1
Replicate	Psi	Phi	Eigen 1	Eigen 2	Eigen 3	Eigen 4	Eigen 5	%
1	1.7566**	0.2964**	2.16099**	0.90139	0.72887	0.68322	0.52552	43.2
2	0.6518**	0.1805**	1.66782**	1.05991	0.86825	0.76219	0.64183	33.4
3	1.4368**	0.268**	2.04434**	0.93271	0.76542	0.70281	0.55472	40.9
4	2.5494**	0.357**	2.41**	0.79429	0.72755	0.60685	0.46132	48.2
5	1.475**	0.2716**	2.0568**	0.93381	0.80218	0.6168	0.5904	41.1
6	1.6425**	0.2866**	2.12077**	0.90643	0.74288	0.70154	0.52838	42.4
7	0.8952**	0.2116**	1.82259**	0.92336	0.86497	0.75711	0.63196	36.5
8	1.8752**	0.3062**	2.2045**	0.89559	0.70377	0.63443	0.56171	44.1
9	1.698**	0.2914**	2.11942**	0.9918	0.77572	0.58111	0.53195	42.4
10	1.1322**	0.2379**	1.91025**	1.00805	0.81091	0.66628	0.60452	38.2
11	0.5831**	0.1708**	1.60362**	1.13362	0.83077	0.79002	0.64197	32.1
12	1.4636**	0.2705**	2.05622**	0.92873	0.77779	0.6552	0.58207	41.1
13	0.897**	0.2118**	1.82462**	0.93181	0.85116	0.74911	0.6433	36.5
14	0.5179**	0.1609**	1.44423*	1.27387**	0.93283	0.79543	0.55363	54.4
15	1.68**	0.2898**	2.1426**	0.87212	0.75884	0.63323	0.59322	42.9
16	0.9247**	0.215**	1.8084**	1.05486	0.79589	0.73877	0.60209	36.2
17	1.0558**	0.2298**	1.89549**	0.9424	0.82334	0.68932	0.64944	37.9
18	2.1561**	0.3283**	2.29951**	0.80253	0.72971	0.65279	0.51546	46
19	1.1321**	0.2379**	1.89461**	0.99236	0.88065	0.72307	0.50931	37.9
20	1.7474**	0.2956**	2.15167**	0.92077	0.76931	0.63955	0.51869	43
21	1.252**	0.2502**	1.90418**	1.16134	0.78502	0.59084	0.55862	38.1
22	1.1164**	0.2363**	1.89864**	1.02223	0.78585	0.72638	0.5669	38
23	0.823**	0.2029**	1.77792**	0.96507	0.85289	0.79552	0.60859	35.6
24	2.3461**	0.3425**	2.34438**	0.86256	0.71885	0.6153	0.4589	46.9
25	2.0667**	0.3215**	2.26309**	0.86893	0.74131	0.61715	0.50951	45.3
26	1.2175**	0.2467**	1.93979**	0.97615	0.85706	0.6988	0.5282	38.8
27	1.1915**	0.2441**	1.91009**	1.03797	0.8797	0.63489	0.53734	38.2
28	1.4759**	0.2717**	2.04058**	1.01773	0.74113	0.65602	0.54455	40.8
29	0.8241**	0.203**	1.78917**	0.9357	0.85032	0.78067	0.64413	35.8
30	2.3987**	0.3463**	2.36265**	0.86908	0.68695	0.58946	0.49186	47.3
31	1.1261**	0.2373**	1.93037**	0.89179	0.81862	0.75256	0.60665	38.6
32	1.7562**	0.2963**	2.14773**	0.94424	0.73328	0.69714	0.47761	43
33	1.4847**	0.2725**	2.04018**	0.99657	0.80266	0.65619	0.50441	40.8
34	0.5223**	0.1616**	1.57732**	1.07762	0.92617	0.77534	0.64354	31.5
35	1.3421**	0.259**	2.01685**	0.90325	0.77089	0.71604	0.59298	40.3
36	1.1955**	0.2445**	1.96505**	0.86568	0.81845	0.71025	0.64057	39.3
37	1.0792**	0.2323**	1.8568**	1.01959	0.84674	0.81129	0.46557	37.1
38	1.1077**	0.2353**	1.90972**	0.96785	0.81829	0.6963	0.60784	38.2
39	2.8435**	0.3771**	2.49904**	0.75457	0.64283	0.60973	0.49383	50
40	0.7303**	0.1911**	1.72285**	0.98696	0.87988	0.80334	0.60697	34.5
41	1.6305**	0.2855**	2.07245**	1.04891	0.77121	0.67051	0.43693	41.4
42	0.6441**	0.1795**	1.65273**	1.06766	0.89497	0.7733	0.61135	33.1
43	1.4749**	0.2716**	2.04767**	0.96497	0.76071	0.71277	0.51388	41
44	1.7058**	0.292**	2.13416**	0.92282	0.80656	0.60866	0.5278	42.7
45	1.4037**	0.2649**	2.03467**	0.90681	0.79574	0.70556	0.55723	40.7
46	1.4766**	0.2717**	2.04257**	0.95821	0.83988	0.6462	0.51314	40.9
47	1.5573**	0.279**	2.07584**	0.9722	0.74109	0.70715	0.50372	41.5
48	1.4797**	0.272**	2.06738**	0.89851	0.78354	0.65994	0.59062	41.3
49	1.2042**	0.2454**	1.96494**	0.87312	0.82941	0.7168	0.61573	39.3
50	1.503**	0.2741**	2.07028**	0.89289	0.7992	0.70564	0.53199	41.4
51	1.613**	0.284**	2.09448**	0.95085	0.81572	0.63276	0.50619	41.9
52	1.1665**	0.2415**	1.93515**	0.964	0.81502	0.6698	0.61604	38.7
53	0.7647**	0.1955**	1.68738**	1.14345	0.87166	0.71361	0.5839	33.7
54	1.8534**	0.3044**	2.18591**	0.89518	0.815	0.56371	0.54019	43.7
55	1.0102**	0.2247**	1.84398**	0.95495	0.9235	0.75947	0.51811	36.9
56	0.8625**	0.2077**	1.79551**	0.97757	0.88226	0.68954	0.65514	35.9
57	1.9811**	0.3147**	2.24678**	0.82755	0.71478	0.65123	0.55966	44.9
58	1.6841**	0.2902**	2.14086**	0.87196	0.75756	0.6877	0.54191	42.8
59	0.792**	0.199**	1.74833**	1.03178	0.85636	0.74427	0.61926	35
60	1.4243**	0.2669**	2.04735**	0.91107	0.73457	0.72013	0.58689	40.9
61	1.3859**	0.2632**	1.99501**	0.96755	0.90238	0.64223	0.49283	39.9
62	0.8807**	0.2098**	1.80412**	0.95929	0.88064	0.75133	0.60462	36.1
63	1.1839**	0.2433**	1.92821**	1.01063	0.80753	0.68421	0.56941	38.6
64	0.8494**	0.2061**	1.78421**	0.93734	0.88414	0.82675	0.56756	35.7
65	1.1994**	0.2449**	1.92517**	0.96211	0.92697	0.64393	0.54182	38.5
66	1.6311**	0.2856**	2.10007**	0.99289	0.73464	0.64936	0.52303	42
67	0.9395**	0.2167**	1.8138**	1.01376	0.85707	0.76313	0.55224	36.3
68	0.7874**	0.1984**	1.72588**	1.066	0.85097	0.79551	0.56164	34.5
69	1.9529**	0.3125**	2.22526**	0.8859	0.75825	0.59861	0.53198	44.5
70	0.9401**	0.2168**	1.80343**	1.06297	0.87502	0.63834	0.62024	36.1
71	0.8723**	0.2088**	1.80828**	0.91913	0.86075	0.806	0.60584	36.2
72	0.7329**	0.1914**	1.72396**	0.99815	0.9052	0.72535	0.64735	34.5
73	1.5339**	0.2769**	2.09411**	0.865	0.74864	0.69573	0.59651	41.9
74	2.3306**	0.3414**	2.35845**	0.73767	0.7344	0.60682	0.56266	47.2
75	0.5237**	0.1618**	1.60427**	1.01411	0.91798	0.79429	0.66935	32.1
76	1.2726**	0.2523**	1.94732**	1.04398	0.83222	0.64322	0.53326	38.9
77	1.3248**	0.2574**	1.95044**	1.09827	0.79857	0.65481	0.49791	39
78	1.7651**	0.2971**	2.16927**	0.86422	0.74792	0.68229	0.5363	43.4
79	1.5036**	0.2742**	2.04028**	1.01296	0.78625	0.68801	0.47251	40.8
80	2.1099**	0.3248**	2.28981**	0.78751	0.72109	0.64906	0.55255	45.8
81	1.5878**	0.2818**	2.06612**	0.98936	0.8566	0.62936	0.45856	41.3
82	1.5097**	0.2747**	2.06615**	0.92991	0.81633	0.64039	0.54721	41.3
83	1.354**	0.2602**	2.01829**	0.90858	0.81188	0.64653	0.61472	40.4
84	1.1074**	0.2353**	1.88637**	1.04555	0.82622	0.65351	0.58836	37.7
85	1.4095**	0.2655**	2.04207**	0.85894	0.81912	0.71649	0.56337	40.8
86	1.6526**	0.2875**	2.11452**	0.91514	0.81413	0.65793	0.49827	42.3
87	0.796**	0.1995**	1.7559**	1.02061	0.8538	0.73037	0.63931	35.1
88	1.0712**	0.2314**	1.86576**	1.0556	0.84151	0.65378	0.58335	37.3
89	0.8113**	0.2014**	1.71731**	1.08323	0.93489	0.71931	0.54526	34.3
90	2.3237**	0.3409**	2.34133**	0.85624	0.72064	0.58678	0.49501	46.8
91	1.2225**	0.2472**	1.95543**	0.95391	0.83347	0.67302	0.58418	39.1
92	0.8732**	0.2089**	1.77158**	1.05683	0.84605	0.77105	0.55449	35.4
93	1.1008**	0.2346**	1.90837**	0.96633	0.82079	0.66899	0.63553	38.2
94	1.0539**	0.2296**	1.8851**	0.93309	0.88	0.71375	0.58807	37.7
95	1.1311**	0.2378**	1.92281**	0.97094	0.78858	0.68349	0.63418	38.5
96	2.6301**	0.3626**	2.42995**	0.82988	0.71392	0.52773	0.49852	48.6
97	1.8293**	0.3024**	2.1918**	0.84039	0.77642	0.65265	0.53874	43.8
98	1.7743**	0.2979**	2.14095**	0.98372	0.78229	0.62904	0.46401	42.8
99	0.9537**	0.2184**	1.78809**	1.11594	0.86267	0.67302	0.56028	35.8
100	1.6059**	0.2834**	2.11352**	0.91277	0.72514	0.63928	0.60929	42.3
