# Supplementary material for: PCAtest: testing the statistical significance of Principal Component Analysis in R
Source: PeerJ. 2022 Feb 17;10:e12967. doi: 10.7717/peerj.12967 (PMC8858582; doi:10.7717/peerj.12967)
Supplement: Supplemental Information 3 — Observed Psi and Phi values, and eigenvalues obtained from the PCAtest analysis of 100 replicate datasets generated with correlation (r = 0.5) among five variables and 100 observations. Significant values based on permutation test are indicated with asterisks (** = P < 0.01). % = percentage of explained variance accounted for PC1. [file peerj-10-12967-s003.xlsx]

## Sheet: Hoja1
Replicate	Psi	Phi	Eigen 1	Eigen 2	Eigen 3	Eigen 4	Eigen 5	%
1	5.0399**	0.502**	3.00005**	0.65698	0.50765	0.44366	0.39165	60
2	5.2343**	0.5116**	3.04253**	0.58257	0.52325	0.45359	0.39806	60.9
3	5.4407**	0.5216**	3.08201**	0.59141	0.49165	0.44821	0.38672	61.6
4	4.698**	0.4847**	2.92829**	0.6358	0.61819	0.44337	0.37436	58.6
5	5.1104**	0.5055**	3.00716**	0.67633	0.5508	0.46492	0.30079	60.1
6	5.1738**	0.5086**	3.02087**	0.71265	0.47504	0.42279	0.36865	60.4
7	6.627**	0.5756**	3.29781**	0.55591	0.42896	0.38294	0.33438	66
8	5.4361**	0.5213**	3.07902**	0.60614	0.522	0.42414	0.36871	61.6
9	5.0038**	0.5002**	2.9947**	0.64217	0.50276	0.44325	0.41711	59.9
10	4.1528**	0.4557**	2.81868**	0.63858	0.58062	0.48602	0.47611	56.4
11	4.8084**	0.4903**	2.9522**	0.65888	0.55376	0.4588	0.37636	59
12	3.6523**	0.4273**	2.69722**	0.73047	0.62783	0.51433	0.43015	53.9
13	4.7095**	0.4853**	2.93828**	0.58324	0.55817	0.48002	0.44029	58.8
14	4.6291**	0.4811**	2.917**	0.64339	0.57301	0.46793	0.39866	58.3
15	5.5844**	0.5284**	3.10399**	0.63833	0.49798	0.43299	0.32671	62.1
16	5.4569**	0.5223**	3.08213**	0.58995	0.56196	0.39215	0.37381	61.6
17	3.8574**	0.4392**	2.74665**	0.71674	0.57871	0.53298	0.42492	54.9
18	4.9959**	0.4998**	2.98852**	0.64608	0.5813	0.42271	0.36138	59.8
19	3.4706**	0.4166**	2.6387**	0.80937	0.63982	0.57311	0.339	52.8
20	4.4205**	0.4701**	2.87365**	0.6535	0.57619	0.47684	0.41983	57.5
21	5.9309**	0.5446**	3.16971**	0.60146	0.48958	0.43732	0.30193	63.4
22	4.6163**	0.4804**	2.89974**	0.73065	0.62999	0.41202	0.3276	58
23	4.7888**	0.4893**	2.95462**	0.58187	0.5437	0.48972	0.43008	59.1
24	5.7302**	0.5353**	3.13446**	0.62679	0.43158	0.41922	0.38794	62.7
25	4.5635**	0.4777**	2.89939**	0.68933	0.5764	0.44159	0.39329	58
26	5.2705**	0.5133**	3.04456**	0.59718	0.57809	0.44498	0.33519	60.9
27	6.0622**	0.5506**	3.19886**	0.54151	0.4741	0.43122	0.35432	64
28	5.5312**	0.5259**	3.0911**	0.679	0.48166	0.4149	0.33336	61.8
29	5.4278**	0.521**	3.07358**	0.63862	0.53066	0.42778	0.32936	61.5
30	6.8974**	0.5873**	3.34206**	0.56799	0.43556	0.35547	0.29892	66.8
31	3.3601**	0.4099**	2.63297**	0.69708	0.63599	0.55314	0.48082	52.7
32	3.9368**	0.4437**	2.76794**	0.66097	0.58609	0.56257	0.42244	55.4
33	3.3738**	0.4107**	2.62876**	0.76901	0.61907	0.54416	0.439	52.6
34	5.7983**	0.5384**	3.14843**	0.5688	0.50914	0.42954	0.34409	63
35	5.0378**	0.5019**	3.00271**	0.58619	0.5524	0.47475	0.38396	60.1
36	6.276**	0.5602**	3.23807**	0.50649	0.47966	0.42911	0.34667	64.8
37	4.1797**	0.4571**	2.81473**	0.66488	0.63004	0.54914	0.3412	56.3
38	7.1195**	0.5966**	3.38449**	0.49053	0.40484	0.38182	0.33832	67.7
39	5.0308**	0.5015**	3.0007**	0.59854	0.55341	0.46321	0.38414	60
40	3.9528**	0.4446**	2.76789**	0.70576	0.61191	0.47877	0.43566	55.4
41	4.3772**	0.4678**	2.86706**	0.6379	0.55578	0.47981	0.45944	57.3
42	6.9316**	0.5887**	3.35114**	0.49439	0.46933	0.37512	0.31001	67
43	3.9826**	0.4462**	2.76946**	0.73478	0.61938	0.48905	0.38734	55.4
44	4.4801**	0.4733**	2.87403**	0.74237	0.59747	0.43152	0.35461	57.5
45	5.1577**	0.5078**	3.01651**	0.72372	0.48056	0.39635	0.38286	60.3
46	4.409**	0.4695**	2.86713**	0.6952	0.56281	0.49148	0.38338	57.3
47	4.2814**	0.4627**	2.8254**	0.75657	0.59265	0.54362	0.28177	56.5
48	6.2402**	0.5586**	3.23034**	0.51336	0.47884	0.45942	0.31804	64.6
49	6.6987**	0.5787**	3.3078**	0.57393	0.45767	0.3379	0.3227	66.2
50	4.4239**	0.4703**	2.87207**	0.689	0.53718	0.50235	0.39939	57.4
51	5.9181**	0.544**	3.16921**	0.58003	0.51445	0.40025	0.33606	63.4
52	4.8353**	0.4917**	2.95733**	0.67386	0.53565	0.44295	0.3902	59.1
53	5.0881**	0.5044**	3.00345**	0.72085	0.47936	0.4193	0.37705	60.1
54	5.7658**	0.5369**	3.13835**	0.60304	0.53944	0.40034	0.31883	62.8
55	4.1329**	0.4546**	2.8092**	0.68628	0.57017	0.53314	0.40121	56.2
56	6.0468**	0.5499**	3.19407**	0.58234	0.46587	0.40627	0.35144	63.9
57	4.3442**	0.4661**	2.84532**	0.76686	0.56395	0.4496	0.37427	56.9
58	4.9947**	0.4997**	2.98754**	0.66672	0.53963	0.46898	0.33713	59.8
59	3.84**	0.4382**	2.73676**	0.74689	0.59617	0.5422	0.37798	54.7
60	3.6788**	0.4289**	2.69608**	0.75362	0.64254	0.54633	0.36142	53.9
61	5.1515**	0.5075**	3.01888**	0.68759	0.49841	0.41473	0.38039	60.4
62	4.3136**	0.4644**	2.84803**	0.67142	0.60192	0.47916	0.39947	57
63	5.2236**	0.5111**	3.03627**	0.60837	0.5691	0.42123	0.36502	60.7
64	5.3987**	0.5196**	3.07291**	0.58517	0.5397	0.41576	0.38647	61.5
65	4.2019**	0.4584**	2.82638**	0.68744	0.55071	0.47469	0.46077	56.5
66	5.1252**	0.5062**	3.01624**	0.61979	0.56273	0.45416	0.34707	60.3
67	3.5444**	0.421**	2.66798**	0.72872	0.66966	0.54084	0.3928	53.4
68	4.9072**	0.4953**	2.97886**	0.56967	0.54933	0.46386	0.43827	59.6
69	5.8178**	0.5393**	3.15071**	0.58049	0.52539	0.39907	0.34434	63
70	5.3318**	0.5163**	3.06155**	0.56403	0.54047	0.43655	0.3974	61.2
71	6.3995**	0.5657**	3.25753**	0.52571	0.50361	0.39949	0.31366	65.2
72	4.2578**	0.4614**	2.83855**	0.65094	0.59084	0.50822	0.41145	56.8
73	4.3383**	0.4657**	2.85664**	0.66212	0.53407	0.52704	0.42013	57.1
74	4.151**	0.4556**	2.81741**	0.65424	0.57244	0.49522	0.4607	56.3
75	5.3885**	0.5191**	3.0744**	0.55246	0.49201	0.46407	0.41706	61.5
76	5.6296**	0.5305**	3.11649**	0.56479	0.54652	0.41061	0.36158	62.3
77	6.178**	0.5558**	3.21178**	0.62128	0.50216	0.37317	0.29161	64.2
78	5.6003**	0.5292**	3.10864**	0.61527	0.5193	0.4105	0.34629	62.2
79	7.1489**	0.5979**	3.38638**	0.54121	0.39665	0.37503	0.30072	67.7
80	5.6148**	0.5298**	3.11651**	0.5582	0.49293	0.44049	0.39187	62.3
81	5.204**	0.5101**	3.03313**	0.63457	0.51554	0.44101	0.37575	60.7
82	5.2231**	0.511**	3.03694**	0.63169	0.52151	0.4286	0.38126	60.7
83	6.1403**	0.5541**	3.21206**	0.55414	0.48209	0.39787	0.35384	64.2
84	5.812**	0.5391**	3.15311**	0.56114	0.47379	0.42702	0.38495	63.1
85	3.9338**	0.4435**	2.761**	0.74923	0.57465	0.47113	0.44399	55.2
86	4.7985**	0.4898**	2.94606**	0.69805	0.55452	0.44194	0.35942	58.9
87	3.3404**	0.4087**	2.62705**	0.71216	0.62811	0.56152	0.47117	52.5
88	3.7341**	0.4321**	2.70411**	0.83874	0.53301	0.52255	0.4016	54.1
89	4.7211**	0.4859**	2.93519**	0.66812	0.52961	0.47231	0.39478	58.7
90	4.5763**	0.4783**	2.90321**	0.6809	0.56717	0.45794	0.39078	58.1
91	6.2383**	0.5585**	3.22218**	0.6363	0.47795	0.36596	0.29761	64.4
92	5.2229**	0.511**	3.02404**	0.73102	0.54362	0.38428	0.31704	60.5
93	4.9206**	0.496**	2.98115**	0.57957	0.53646	0.48411	0.41871	59.6
94	4.6456**	0.482**	2.92433**	0.61M	0.52994	0.50745	0.42828	58.5
95	4.5025**	0.4745**	2.89453**	0.59447	0.57313	0.5047	0.43316	57.9
96	4.4805**	0.4733**	2.8859**	0.67344	0.53705	0.48237	0.42124	57.7
97	4.0901**	0.4522**	2.80564**	0.61484	0.57288	0.55628	0.45036	56.1
98	5.5546**	0.527**	3.10606**	0.53754	0.49048	0.4685	0.39741	62.1
99	3.6072**	0.4247**	2.68363**	0.7451	0.61536	0.56329	0.39262	53.7
100	5.3262**	0.5161**	3.05425**	0.63623	0.54389	0.42772	0.33791	61.1
