# Supplementary material for: PCAtest: testing the statistical significance of Principal Component Analysis in R
Source: PeerJ. 2022 Feb 17;10:e12967. doi: 10.7717/peerj.12967 (PMC8858582; doi:10.7717/peerj.12967)
Supplement: Supplemental Information 4 — Observed eigenvalues and index of the loadings obtained from the PCAtest analysis of an example dataset containing seven variables and 29 observations (Wong & Carmona, 2021). Significant values based on permutation test are indicated with asterisks (* = P < 0.05, ** = P < 0.01). % = percentage of explained variance. [file peerj-10-12967-s004.xlsx]

## Sheet: Hoja1
	PC 1	PC 2	PC 3	PC 4	PC 5	PC 6	PC 7
Eigenvalue	3.84712**	1.52017	0.70634	0.41356	0.34001	0.14515	0.02765
%	54.9	21.7	10.1	5.9	4.9	2.1	0.4
Index loadings
Variable 1	2.4127*	0.0843623	0.0583255	0.0625733	0.0274887	7.61658e-05	5.83339e-05
Variable 2	2.8269*	0.214419	0.00416176	0.012893	0.000302461	0.0123293	<0.0001
Variable 3	2.3555*	0.131639	0.0989275	0.0242227	0.0227461	0.0051599	<0.0001
Variable 4	1.9192*	0.222908	0.155873	0.00928325	0.0314079	0.00273435	<0.0001
Variable 5	2.2572*	0.442532	0.0553836	6.69045e-06	0.0103777	0.000116652	0.000343646
Variable 6	0.367009	0.941454	0.113837	0.0313532	0.0161212	7.78651e-05	<0.0001
Variable 7	2.6619*	0.273593	0.0124065	0.0306993	0.00716601	0.000575335	0.000311896
