# Supplementary material for: PCAtest: testing the statistical significance of Principal Component Analysis in R
Source: PeerJ. 2022 Feb 17;10:e12967. doi: 10.7717/peerj.12967 (PMC8858582; doi:10.7717/peerj.12967)
Supplement: Supplemental Information 5 — Observed eigenvalues and index of the loadings obtained from the Q-mode PCAtest analysis of transposed Ringnér (2008)’s microarray data (8,534 variables, 105 observations). Significant values based on permutation test are indicated with asterisks (* = P < 0.05, ** = P < 0.01). % = percentage of explained variance. [file peerj-10-12967-s005.xlsx]

## Sheet: Hoja1
	PC 1	PC 2	PC 3	PC 4	PC 5	PC 6
Eigenvalue	70.54271**	4.3683**	2.53236**	2.01747**	1.87908**	1.58179**
%	67.2	4.2	2.4	1.9	1.8	1.5
Index loadings
Variable 1	48.54858*	0.21052*	0.09493*	0.00249	0.00904	0.00154
Variable 2	37.92066*	0.69663*	0.01056	1e-05	0.00043	0.04247
Variable 3	48.52036*	0.028	0.00172	0.00754	0.1746*	4e-05
Variable 4	41.62068*	0.22084*	0.18848*	0.07165*	0.00472	0.01295
Variable 5	54.10441*	0.21766*	0.00139	0.0038	0.02846	0.02101
Variable 6	51.98412*	0.15782*	0.01312	0.00457	0.03011	0.0086
Variable 7	53.47687*	0.12356*	0.11411*	0.00034	0.01159	0.00381
Variable 8	42.88629*	0.41009*	0.00011	2e-05	0.00585	0.00565
Variable 9	46.25654*	0.10476*	0.04682	0.09461*	0.19474*	0.00027
Variable 10	42.9157*	0.00023	0.01274	0.00373	0.11644*	0.03987
Variable 11	48.83912*	0.23188*	0.11374*	0.00928	0.00242	0.05786*
Variable 12	54.56428*	0.05941*	0.10532*	0.02352	0.02445	0.00226
Variable 13	54.72117*	0.18693*	0.00763	0.00114	0.05819*	0.03308
Variable 14	39.59178*	0.55146*	0.01946	0.00338	0.02928	0.02002
Variable 15	54.64219*	0.29102*	0.00014	0.00845	0.13363*	0.02037
Variable 16	46.14014*	0.21371*	0.0247	0.18314*	0.00375	0.00236
Variable 17	28.7888*	0.3028*	0.00264	0.00716	0.00234	0.28239*
Variable 18	42.19528*	0.27965*	0.16957*	0.04762	0.00299	0.03241
Variable 19	41.02138*	0.32223*	0.11461*	0.03568	0.01549	0.03707
Variable 20	53.67557*	0.00522	0.02348	0.03626	0.01283	0.03852
Variable 21	42.32331*	0.38561*	0.00101	0.00485	0.0008	0.11328*
Variable 22	49.65408*	0.45015*	0.0165	5e-05	0.00013	0.03049
Variable 23	48.55244*	0.03081	0.01643	0.0114	0.10999*	0.04658
Variable 24	40.62948*	0.57903*	0.00077	0.0045	0.01818	0.01745
Variable 25	54.2565*	0.02931	0.04974*	0.06116*	0.00487	0.03021
Variable 26	51.85946*	0.01888	0.04301	0.064*	0.00055	0.06411*
Variable 27	56.35384*	0.14607*	3e-05	0.0204	0.00561	0.00201
Variable 28	32.46538*	0.03371	0.2956*	0.03321	0.00157	0.09135*
Variable 29	52.47966*	0.02314	0.05986*	0.10317*	0.00408	0.00055
Variable 30	40.67474*	0.07673*	0.30323*	0.09852*	0.00414	0.01266
Variable 31	50.30007*	0.09143*	0.03921	0.08621*	0.08122*	0.03665
Variable 32	56.06796*	0.04296	0.01442	0.04236	6e-05	0
Variable 33	40.51206*	0.55019*	0.00357	0.01491	0.04377	0.00069
Variable 34	29.54628*	0.31958*	0.10816*	0.42953*	0.00564	0.00602
Variable 35	47.85065*	0.00078	0.02193	0.05882*	0.17296*	0.0088
Variable 36	44.57352*	0.00449	0.01733	0.03905	0.01737	0.03817
Variable 37	55.17501*	0.00158	0.00014	0.03218	0.03268	0.00333
Variable 38	55.3862*	0.30937*	0.02664	0.00785	0.01156	0.00085
Variable 39	45.29102*	0.39516*	0.16102*	0.00112	0.00277	0.00884
Variable 40	57.23635*	0.01837	4e-05	0.0249	0.01178	0.01975
Variable 41	43.8226*	0.44992*	0.01392	0.00524	0.06191*	0.0252
Variable 42	52.45535*	0.18787*	0.03008	0.03077	0.04647	0.00017
Variable 43	34.50252*	0.6388*	0.00237	0.15497*	0.01372	0.00282
Variable 44	45.21377*	0.03359	0.03724	0.00024	0.06401*	0.00789
Variable 45	55.99641*	0.00218	0.00947	0.02338	0.01439	0.02748
Variable 46	28.21141*	0.36316*	0.03135	0.17698*	0.03232	0.07139*
Variable 47	52.24961*	0.10679*	0.01155	0.00188	9e-05	0.00725
Variable 48	53.84089*	0.0169	0.02304	0.00294	0.06872*	0.01437
Variable 49	48.86321*	1e-05	0.03784	0.03072	0.00094	0.00578
Variable 50	29.34368*	1.0362*	0.00058	0.05049*	0.01067	0.01523
Variable 51	44.11458*	0.13058*	0.17551*	0.02208	0.00648	0.01705
Variable 52	53.90725*	0.10779*	0.03048	0.00047	0.00943	0
Variable 53	32.84806*	0.73053*	0.07992*	0.01629	0.00949	0.00342
Variable 54	37.26888*	0.03069	0.05406*	0.32861*	0.00238	0.06492*
Variable 55	56.7583*	0.08084*	0.00034	0.00011	0.02849	0.00394
Variable 56	56.9466*	0.01055	0.14173*	0.03406	0.07184*	0.0012
Variable 57	35.67046*	0.56262*	0.04439	0.04397	3e-05	0.00241
Variable 58	41.29318*	0.60577*	0.00316	4e-05	0.00065	0.00646
Variable 59	49.89892*	0.05555*	0.04627	0.00015	0.00536	0.00865
Variable 60	49.39891*	0.05183*	0.02553	0.07347*	0.01341	0.00145
Variable 61	53.38362*	0.19776*	0.01718	0.01237	0.00391	0.00352
Variable 62	46.79331*	0.03502	0.01462	0.02467	0.17556*	0.02661
Variable 63	40.57796*	0.05833*	0.18611*	0.0009	0.12348*	0.07388*
Variable 64	53.4061*	0.00055	3e-05	0.02311	0.02209	0.01174
Variable 65	16.14844*	0.81087*	0.06943*	0.01815	0.00708	0.03842
Variable 66	59.17651*	0.1092*	0.01385	0.00704	0.01921	0.00899
Variable 67	14.57477*	1.02307*	0.25656*	0.02854	0.02647	0.01197
Variable 68	49.94858*	0.0737*	0.0031	0.02581	0.01852	0.03972
Variable 69	44.66029*	0.05553	0.09501*	0.04297	0.03296	0.08283*
Variable 70	41.53593*	0.07835*	0.03263	0.17193*	0.00123	0.20273*
Variable 71	48.90715*	0.08536*	0.11238*	0.05154*	0.03251	0.00028
Variable 72	51.52022*	0.1014*	1e-05	0.07103*	0.065*	0.01839
Variable 73	59.78906*	0.13625*	2e-05	0.00514	0.02219	0.00417
Variable 74	46.39814*	0.19905*	0.00701	0.02534	0.15778*	0
Variable 75	53.67882*	0.24362*	0.05548*	0.00091	0.00166	0.00373
Variable 76	46.42813*	0.44286*	0.0005	0.01333	0.02719	0.00249
Variable 77	55.33655*	0.18139*	0.00728	0.02718	0.02951	0.01384
Variable 78	52.97433*	0.04688	0	0.10824*	0.06793*	0.00152
Variable 79	54.03384*	0.00011	0.02211	0.00551	0.00289	6e-05
Variable 80	52.08503*	0	0.005	0.03976	0.11108*	0.00784
Variable 81	51.21418*	0.01143	0.04986	0.07653*	0.12761*	0.00802
Variable 82	56.59371*	0.26832*	0.06687*	0.00172	0.00646	0.01459
Variable 83	57.36798*	0.17737*	1e-05	0.00453	0.08656*	0.00011
Variable 84	45.75928*	0.00729	0.01313	0.13593*	0.01	0.02074
Variable 85	45.06938*	0.03933	0.01925	0.12942*	0.04822*	0.04789
Variable 86	55.53181*	0.09753*	1e-05	0.01997	0.01469	0.00141
Variable 87	52.95089*	0.10914*	0.08122*	0.00315	0.00883	0.06007*
Variable 88	46.63815*	0.0099	0.34714*	0.04675	0.00022	0.0247
Variable 89	48.33727*	0.04943*	0.16207*	0.04067	0.01154	0.00016
Variable 90	47.30237*	0.0119	0.08757*	0.0003	0.00485	0.01025
Variable 91	33.00357*	0.1607*	0.13219*	0	0.00954	0.13645*
Variable 92	52.48096*	0.11899*	0.00055	0.03296	1e-05	0.00782
Variable 93	36.90255*	0.00242	0.35731*	0.03443	0.07711*	0.00919
Variable 94	58.86012*	0.07008*	0.01507	0.00509	0.01272	4e-05
Variable 95	55.10026*	0.17572*	0.05506*	0.00168	0.00111	0.00994
Variable 96	60.23156*	0.02444	0.04923	0.00656	0.00054	0.00988
Variable 97	53.97342*	0.06504*	0.00173	0.04553	0.02119	0.01916
Variable 98	32.54784*	0.06628*	0.42224*	0.02591	0.00079	0.00083
Variable 99	49.7287*	0.01062	0.15876*	0.00262	0.02953	0.0044
Variable 100	51.05563*	0.08532*	0.00304	0.00046	0.0724*	0.01879
Variable 101	46.15439*	6e-05	0.11938*	0.00591	0.00123	0.0105
Variable 102	54.48398*	0.04261	0.04341	0.02112	0.00107	0.04699*
Variable 103	57.35566*	0.04696	0.01929	0.00206	0.06997*	0.00011
Variable 104	52.4583*	0.08557*	0.01272	0.0016	0.00081	0.00123
Variable 105	47.60897*	0.14244	0.25469*	0.04236	0.11377*	0.00463
