# Supplementary material for: PCAtest: testing the statistical significance of Principal Component Analysis in R
Source: PeerJ. 2022 Feb 17;10:e12967. doi: 10.7717/peerj.12967 (PMC8858582; doi:10.7717/peerj.12967)
Supplement: Supplemental Information 6 — The literature search used the keyword ‘PCA’ and found 193 articles in total, but 38 of them did not actually apply a PCA analysis. A summary of the results is shown in Table 1. [file peerj-10-12967-s006.xlsx]

## Sheet: Hoja1
Reference	Journal	Section	Apply PCA?	Criterion?	Which?	Citation
Sonthiphand et al. (2021)	PeerJ	Microbiology	Yes	No	None	Sonthiphand P, Rattanaroongrot P, Mek-yong K, Kusonmano K, Rangsiwutisak C, Uthaipaisanwong P, Chotpantarat S, Termsaithong T. 2021. Microbial community structure in aquifers associated with arsenic: analysis of 16S rRNA and arsenite oxidase genes. PeerJ 9:e10653 https://doi.org/10.7717/peerj.10653
Lebedev et al. (2021)	PeerJ	Biodiversity & Conservation	Yes	No	None	Lebedev VS, Kovalskaya Y, Solovyeva EN, Zemlemerova ED, Bannikova AA, Rusin MY, Matrosova VA. 2021. Molecular systematics of the Sicista tianschanica species complex: a contribution from historical DNA analysis. PeerJ 9:e10759 https://doi.org/10.7717/peerj.10759
Domanskyi et al. (2021)	PeerJ	Bioinformatics & Genomics	No	–	–	Domanskyi S, Hakansson A, Bertus TJ, Paternostro G, Piermarocchi C. 2021. Digital Cell Sorter (DCS): a cell type identification, anomaly detection, and Hopfield landscapes toolkit for single-cell transcriptomics. PeerJ 9:e10670 https://doi.org/10.7717/peerj.10670
Nuñez-Penichet et al. (2021)	PeerJ	Biodiversity & Conservation	Yes	Yes	Cumulative variance (97.9%)	Nuñez-Penichet C, Osorio-Olvera L, Gonzalez VH, Cobos ME, Jiménez L, DeRaad DA, Alkishe A, Contreras-Díaz RG, Nava-Bolaños A, Utsumi K, Ashraf U, Adeboje A, Peterson AT, Soberon J. 2021. Geographic potential of the world’s largest hornet, Vespa mandarinia Smith (Hymenoptera: Vespidae), worldwide and particularly in North America. PeerJ 9:e10690 https://doi.org/10.7717/peerj.10690
Merzouki et al. (2021)	PeerJ	Brain, Cognition & Mental Health	Yes	Yes	Cumulative variance (69%)	Merzouki A, Estill J, Orel E, Tal K, Keiser O. 2021. Clusters of sub-Saharan African countries based on sociobehavioural characteristics and associated HIV incidence. PeerJ 9:e10660 https://doi.org/10.7717/peerj.10660
Duan et al. (2021)	PeerJ	Plant Biology	Yes	No	None	Duan H, Zhang Q, Wang C, Li F, Tian F, Lu Y, Hu Y, Yang H, Cui G. 2021. Analysis of codon usage patterns of the chloroplast genome in Delphinium grandiflorum L. reveals a preference for AT-ending codons as a result of major selection constraints. PeerJ 9:e10787 https://doi.org/10.7717/peerj.10787
Zhao et al. (2021)	PeerJ	Bioinformatics & Genomics	Yes	No	None	Zhao Q, Zhang Y, Shao S, Sun Y, Lin Z. 2021. Identification of hub genes and biological pathways in hepatocellular carcinoma by integrated bioinformatics analysis. PeerJ 9:e10594 https://doi.org/10.7717/peerj.10594
Ghergab et al. (2021)	PeerJ	Microbiology	No	–	–	Ghergab A, Selin C, Tanner J, Brassinga AK, Dekievit T. 2021. Pseudomonas chlororaphis PA23 metabolites protect against protozoan grazing by the predator Acanthamoeba castellanii. PeerJ 9:e10756 https://doi.org/10.7717/peerj.10756
Dmuchowski et al. (2021)	PeerJ	Plant Biology	Yes	No	None	Dmuchowski W, Baczewska-Dąbrowska A, Gozdowski D, Brągoszewska P, Gworek B, Suwara I, Chojnacki T, Jóźwiak A, Swiezewska E. 2021. Effect of salt stress in urban conditions on two Acer species with different sensitivity. PeerJ 9:e10577 https://doi.org/10.7717/peerj.10577
Yang et al. (2021)	PeerJ	Biochemistry, Biophysics & Molecular Biology	Yes	No	None	Yang C, Zhou X, Yang H, Gebeyew K, Yan Q, Zhou C, He Z, Tan Z. 2021. Transcriptome analysis reveals liver metabolism programming in kids from nutritional restricted goats during mid-gestation. PeerJ 9:e10593 https://doi.org/10.7717/peerj.10593
Massa et al. (2021)	PeerJ	Plant Biology	Yes	No	None	Massa AN, Bressano M, Soave JH, Buteler MI, Seijo G, Sobolev VS, Orner VA, Oddino C, Soave SJ, Faustinelli PC, de Blas FJ, Lamb MC, Arias RS. 2021. Genotyping tools and resources to assess peanut germplasm: smut-resistant landraces as a case study. PeerJ 9:e10581 https://doi.org/10.7717/peerj.10581
Makarov et al. (2021)	PeerJ Computer Science	–	No	–	–	Makarov I, Kiselev D, Nikitinsky N, Subelj L. 2021. Survey on graph embeddings and their applications to machine learning problems on graphs. PeerJ Computer Science 7:e357 https://doi.org/10.7717/peerj-cs.357
Cerca et al. (2021)	PeerJ	Zoological Science	Yes	No	None	Cerca J, Rivera-Colón AG, Ferreira MS, Ravinet M, Nowak MD, Catchen JM, Struck TH. 2021. Incomplete lineage sorting and ancient admixture, and speciation without morphological change in ghost-worm cryptic species. PeerJ 9:e10896 https://doi.org/10.7717/peerj.10896
Elzeki et al. (2021)	PeerJ Computer Science	–	No	–	–	Elzeki OM, Abd Elfattah M, Salem H, Hassanien AE, Shams M. 2021. A novel perceptual two layer image fusion using deep learning for imbalanced COVID-19 dataset. PeerJ Computer Science 7:e364 https://doi.org/10.7717/peerj-cs.364
Bereketoglu et al. (2021)	PeerJ	Microbiology	Yes	No	None	Bereketoglu C, Nacar G, Sari T, Mertoglu B, Pradhan A. 2021. Transcriptomic analysis of nonylphenol effect on Saccharomyces cerevisiae. PeerJ 9:e10794 https://doi.org/10.7717/peerj.10794
Zhang et al. (2021)	PeerJ	Microbiology	Yes	No	None	Zhang W, Meng Y, Jing J, Wu Y, Li S. 2021. Influence of periodontal treatment on blood microbiotas: a clinical trial. PeerJ 9:e10846 https://doi.org/10.7717/peerj.10846
Wang et al. (2021)	PeerJ	Biochemistry, Biophysics & Molecular Biology	Yes	No	None	Wang J, Wu X, Tu Y, Dang J, Cai Z, Liao W, Quan W, Wei Y. 2021. An integrated analysis of lncRNA and mRNA expression profiles in the kidneys of mice with lupus nephritis. PeerJ 9:e10668 https://doi.org/10.7717/peerj.10668
Liu et al. (2021)	PeerJ	Biochemistry, Biophysics & Molecular Biology	Yes	No	None	Liu L, Fang C, Sun Y, Liu W. 2021. Evaluation of key miRNAs during early pregnancy in Kazakh horse using RNA sequencing. PeerJ 9:e10796 https://doi.org/10.7717/peerj.10796
Montes-Dominguez et al. (2021)	PeerJ	Aquatic Biology	Yes	No	None	Montes-Dominguez AL, Avena-Soto JA, Lizarraga-Rodriguez JL, Perez-Gala RdJ, Jimenez-Gutierrez S, Sotelo-Falomir JA, Pinzon-Miranda FM, Martinez-Perez F, Muñoz-Rubi HA, Chavez-Herrera D, Jimenez-Gutierrez LR. 2021. Comparison between cultured and wild Pacific white shrimp (Penaeus vannamei) vitellogenesis: next-generation sequencing and relative expression of genes directly and indirectly related …
King et al. (2021)	PeerJ	Paleontology & Evolutionary Science	Yes	No	None	King TR, Myers TJ, Armstrong KN, Archer M, Hand SJ. 2021. Sheath-tailed bats (Chiroptera: Emballonuridae) from the early Pleistocene Rackham’s Roost Site, Riversleigh World Heritage Area, and the distribution of northern Australian emballonurid species. PeerJ 9:e10857 https://doi.org/10.7717/peerj.10857
Peng et al. (2021)	PeerJ	Plant Biology	Yes	No	None	Peng L, Qian L, Wang M, Liu W, Song X, Cheng H, Yuan F, Zhao M. 2021. Comparative transcriptome analysis during seeds development between two soybean cultivars. PeerJ 9:e10772 https://doi.org/10.7717/peerj.10772
Bischof et al. (2021)	PeerJ	Paleontology & Evolutionary Science	Yes	No	None	Bischof EA, Schlüter N, Korn D, Lehmann J. 2021. Ontogeny of highly variable ceratitid ammonoids from the Anisian (Middle Triassic) PeerJ 9:e10931 https://doi.org/10.7717/peerj.10931
Shalaby et al. (2021)	PeerJ Computer Science	–	No	–	–	Shalaby A, Gad R, Hemdan EE, El-Fishawy N. 2021. An efficient multi-factor authentication scheme based CNNs for securing ATMs over cognitive-IoT. PeerJ Computer Science 7:e381 https://doi.org/10.7717/peerj-cs.381
Rashid et al. (2021)	PeerJ Computer Science	–	No	–	–	Rashid M, Bari BS, Hasan MJ, Razman MAM, Musa RM, Ab Nasir AF, P.P. Abdul Majeed A. 2021. The classification of motor imagery response: an accuracy enhancement through the ensemble of random subspace k-NN. PeerJ Computer Science 7:e374 https://doi.org/10.7717/peerj-cs.374
Gao et al. (2021)	PeerJ	Biochemistry, Biophysics & Molecular Biology	No	–	–	Gao Y, Fan W, Song Z, Lou H, Kang X. 2021. Comparison of circulating tumor cell (CTC) detection rates with epithelial cell adhesion molecule (EpCAM) and cell surface vimentin (CSV) antibodies in different solid tumors: a retrospective study. PeerJ 9:e10777 https://doi.org/10.7717/peerj.10777
Su et al. (2021)	PeerJ	Environmental Science	Yes	No	None	Su Y, Wang D, Zhao S, Shi J, Shi Y, Wei D. 2021. Examining long-term natural vegetation dynamics in the Aral Sea Basin applying the linear spectral mixture model. PeerJ 9:e10747 https://doi.org/10.7717/peerj.10747
Tong et al. (2021)	PeerJ	Microbiology	Yes	No	None	Tong X, Wang F, Zhang H, Bai J, Dong Q, Yue P, Jiang X, Li X, Wang L, Guo J. 2021. iTRAQ-based comparative proteome analyses of different growth stages revealing the regulatory role of reactive oxygen species in the fruiting body development of Ophiocordyceps sinensis. PeerJ 9:e10940 https://doi.org/10.7717/peerj.10940
Garg et al. (2021)	PeerJ	Biodiversity & Conservation	Yes	Yes	Eigenvalue > 1	Garg S, Suyesh R, Das S, Bee MA, Biju SD. 2021. An integrative approach to infer systematic relationships and define species groups in the shrub frog genus Raorchestes, with description of five new species from the Western Ghats, India. PeerJ 9:e10791 https://doi.org/10.7717/peerj.10791
Fan et al. (2021)	PeerJ	Bioinformatics & Genomics	Yes	No	None	Fan F, Huang Z, Chen Y. 2021. Integrated analysis of immune-related long noncoding RNAs as diagnostic biomarkers in psoriasis. PeerJ 9:e11018 https://doi.org/10.7717/peerj.11018
Lustri et al. (2021)	PeerJ	Paleontology & Evolutionary Science	Yes	Yes	Cumulative variance (87%)	Lustri L, Laibl L, Bicknell RDC. 2021. A revision of Prolimulus woodwardi Fritsch, 1899 with comparison to other highly paedomorphic belinurids. PeerJ 9:e10980 https://doi.org/10.7717/peerj.10980
Sobecki et al. (2021)	PeerJ	Bioinformatics & Genomics	No	–	–	Sobecki P, Jóźwiak R, Sklinda K, Przelaskowski A. 2021. Effect of domain knowledge encoding in CNN model architecture—a prostate cancer study using mpMRI images. PeerJ 9:e11006 https://doi.org/10.7717/peerj.11006
Engelberg et al. (2021)	PeerJ	Brain, Cognition & Mental Health	Yes	Yes	Eigenvalue > 1	Engelberg JWM, Schwartz JW, Gouzoules H. 2021. The emotional canvas of human screams: patterns and acoustic cues in the perceptual categorization of a basic call type. PeerJ 9:e10990 https://doi.org/10.7717/peerj.10990
Casazza et al. (2021)	PeerJ	Ecology	Yes	No	None	Casazza G, Macrì C, Dagnino D, Guerrina M, Juin M, Minuto L, Thompson JD, Baumel A, Médail F. 2021. When ecological marginality is not geographically peripheral: exploring genetic predictions of the centre-periphery hypothesis in the endemic plant Lilium pomponium. PeerJ 9:e11039 https://doi.org/10.7717/peerj.11039
Izquierdo-Palma et al. (2021)	PeerJ	Ecology	Yes	No	None	Izquierdo-Palma J, Arizmendi MdC, Lara C, Ornelas JF. 2021. Forbidden links, trait matching and modularity in plant-hummingbird networks: Are specialized modules characterized by higher phenotypic floral integration? PeerJ 9:e10974 https://doi.org/10.7717/peerj.10974
Wang et al. (2021)	PeerJ	–	Yes	No	None	Wang C, Feng Y, Zhou W, Cheng Z, Jiang M, Zhou Y, Fei X. 2021. Screening and identification of endometrial proteins as novel potential biomarkers for repeated implantation failure. PeerJ 9:e11009 https://doi.org/10.7717/peerj.11009
Zhang et al. (2021)	PeerJ	Biochemistry, Biophysics & Molecular Biology	Yes	No	None	Zhang F, Li S, Zhang T, Yu B, Zhang J, Ding H, Ye F, Yuan H, Ma Y, Pan H, He Y. 2021. High throughput microRNAs sequencing profile of serum exosomes in women with and without polycystic ovarian syndrome. PeerJ 9:e10998 https://doi.org/10.7717/peerj.10998
Arias-Padró et al. (2021)	PeerJ	Biochemistry, Biophysics & Molecular Biology	Yes	No	None	Arias Padró MD, Caboni E, Salazar Morin KA, Meraz Mercado MA, Olalde-Portugal V. 2021. Effect of Bacillus subtilis on antioxidant enzyme activities in tomato grafting. PeerJ 9:e10984 https://doi.org/10.7717/peerj.10984
Zou et al. (2021)	PeerJ	Microbiology	Yes	No	None	Zou G, Liu Y, Kong F, Liao L, Deng G, Jiang X, Cai J, Liu W. 2021. Depression of the soil arbuscular mycorrhizal fungal community by the canopy gaps in a Japanese cedar (Cryptomeria japonica) plantation on Lushan Mountain, subtropical China. PeerJ 9:e10905 https://doi.org/10.7717/peerj.10905
Ahmad et al. (2021)	PeerJ	Microbiology	Yes	No	None	Ahmad SJ, Mohamad Zin N, Mazlan NW, Baharum SN, Baba MS, Lau YL. 2021. Metabolite profiling of endophytic Streptomyces spp. and its antiplasmodial potential. PeerJ 9:e10816 https://doi.org/10.7717/peerj.10816
Deng et al. (2021)	PeerJ	Bioinformatics & Genomics	Yes	No	None	Deng W, Wei X, Dong Z, Zhang J, Huang Z, Na N. 2021. Identification of fibroblast activation-related genes in two acute kidney injury models. PeerJ 9:e10926 https://doi.org/10.7717/peerj.10926
Sun et al. (2021)	PeerJ	Plant Biology	Yes	No	None	Sun X, Hu S, Wang X, Liu H, Zhou Yw, Guan Q. 2021. De novo assembly of Amorpha fruticosa L. transcriptome in response to drought stress provides insight into the tolerance mechanisms. PeerJ 9:e11044 https://doi.org/10.7717/peerj.11044
Hameed et al. (2021)	PeerJ Computer Science	–	No	–	–	Hameed SS, Hassan WH, Abdul Latiff L, Ghabban F. 2021. A systematic review of security and privacy issues in the internet of medical things; the role of machine learning approaches. PeerJ Computer Science 7:e414 https://doi.org/10.7717/peerj-cs.414
Zhang et al. (2021)	PeerJ	Microbiology	Yes	No	None	Zhang Z, Tian T, Chen Z, Liu L, Luo T, Dai J. 2021. Characteristics of the gut microbiome in patients with prediabetes and type 2 diabetes. PeerJ 9:e10952 https://doi.org/10.7717/peerj.10952
Ilesanmi et al. (2021)	PeerJ	Brain, Cognition & Mental Health	Yes	No	None	Ilesanmi O, Afolabi A, Uchendu O. 2021. The prospective COVID-19 vaccine: willingness to pay and perception of community members in Ibadan, Nigeria. PeerJ 9:e11153 https://doi.org/10.7717/peerj.11153
Martorell-Barceló et al. (2021)	PeerJ	Zoological Science	Yes	Yes	Cumulative variance (87.6%)	Martorell-Barceló M, Mulet J, Sanllehi J, Signaroli M, Lana A, Barcelo-Serra M, Aspillaga E, Alós J. 2021. Aggressiveness-related behavioural types in the pearly razorfish. PeerJ 9:e10731 https://doi.org/10.7717/peerj.10731
Huang et al. (2021)	PeerJ	Plant Biology	Yes	No	None	Huang J, Chen Q, Rong Y, Tang B, Zhu L, Ren R, Shi T, Chen Q. 2021. Transcriptome analysis revealed gene regulatory network involved in PEG-induced drought stress in Tartary buckwheat (Fagopyrum Tararicum) PeerJ 9:e11136 https://doi.org/10.7717/peerj.11136
Xu et al. (2021)	PeerJ	Bioinformatics & Genomics	No	–	–	Xu Z, Ding Y, Lu W, Zhang K, Wang F, Ding G, Wang J. 2021. Comparison of metastatic castration-resistant prostate cancer in bone with other sites: clinical characteristics, molecular features and immune status. PeerJ 9:e11133 https://doi.org/10.7717/peerj.11133
Feng et al. (2021)	PeerJ	Plant Biology	Yes	No	None	Feng X, Yang Z, Wang X. 2021. Tissue-specific transcriptome analysis of drought stress and rehydration in Trachycarpus fortunei at seedling. PeerJ 9:e10933 https://doi.org/10.7717/peerj.10933
Sawada et al. (2021)	PeerJ	Microbiology	Yes	No	None	Sawada K, Koyano H, Yamamoto N, Yamada T. 2021. The effects of vegetable pickling conditions on the dynamics of microbiota and metabolites. PeerJ 9:e11123 https://doi.org/10.7717/peerj.11123
Gilroy et al. (2021)	PeerJ	Microbiology	Yes	No	None	Gilroy R, Ravi A, Getino M, Pursley I, Horton DL, Alikhan N, Baker D, Gharbi K, Hall N, Watson M, Adriaenssens EM, Foster-Nyarko E, Jarju S, Secka A, Antonio M, Oren A, Chaudhuri RR, La Ragione R, Hildebrand F, Pallen MJ. 2021. Extensive microbial diversity within the chicken gut microbiome revealed by metagenomics and culture. PeerJ 9:e10941 https://doi.org/10.7717/peerj.10941
Buckley et al. (2021)	PeerJ	Ecology	No	–	–	Buckley HL, Day NJ, Lear G, Case BS. 2021. Changes in the analysis of temporal community dynamics data: a 29-year literature review. PeerJ 9:e11250 https://doi.org/10.7717/peerj.11250
Méndez-Rodríguez et al. (2021)	PeerJ	Aquatic Biology	Yes	No	None	Méndez-Rodríguez LC, Hernández-Aguilar B, de Anda-Montañez JA, Balart EF, Román-Rodríguez MJ, Zenteno-Savín T. 2021. Influence of sex and maturity state on trace elements content in liver and muscle of the Sciaenidae Totoaba macdonaldi. PeerJ 9:e11068 https://doi.org/10.7717/peerj.11068
Wang et al. (2021)	PeerJ	Bioinformatics & Genomics	Yes	No	None	Wang S, Wu C, Ma D, Hu Q. 2021. Identification of a ferroptosis-related gene signature (FRGS) for predicting clinical outcome in lung adenocarcinoma. PeerJ 9:e11233 https://doi.org/10.7717/peerj.11233
Janjua et al. (2021)	PeerJ Computer Science	–	Yes	No	None	Janjua SH, Siddiqui GF, Sindhu MA, Rashid U. 2021. Multi-level aspect based sentiment classification of Twitter data: using hybrid approach in deep learning. PeerJ Computer Science 7:e433 https://doi.org/10.7717/peerj-cs.433
Rahmani et al. (2021)	PeerJ Computer Science	–	No	–	–	Rahmani AM, Azhir E, Ali S, Mohammadi M, Ahmed OH, Yassin Ghafour M, Hasan Ahmed S, Hosseinzadeh M. 2021. Artificial intelligence approaches and mechanisms for big data analytics: a systematic study. PeerJ Computer Science 7:e488 https://doi.org/10.7717/peerj-cs.488
Pérez-Torres et al. (2021)	PeerJ	Plant Biology	Yes	No	None	Pérez-Torres C, Ibarra-Laclette E, Hernández-Domínguez E, Rodríguez-Haas B, Pérez-Lira A, Villafán E, Alonso-Sánchez A, García-Ávila CdJ, Ramírez-Pool J, Sánchez-Rangel D. 2021. Molecular evidence of the avocado defense response to Fusarium kuroshium infection: a deep transcriptome analysis using RNA-Seq. PeerJ 9:e11215 https://doi.org/10.7717/peerj.11215
Zhang et al. (2021)	PeerJ	Ecology	Yes	No	None	Zhang W, Han J, Wu H, Zhong Q, Liu W, He S, Zhang L. 2021. Diversity patterns and drivers of soil microbial communities in urban and suburban park soils of Shanghai, China. PeerJ 9:e11231 https://doi.org/10.7717/peerj.11231
Borczyk et al. (2021)	PeerJ	Zoological Science	Yes	No	None	Borczyk B, Paśko Ł, Kusznierz J, Bury S. 2021. Sexual dimorphism and skull size and shape in the highly specialized snake species, Aipysurus eydouxii (Elapidae: Hydrophiinae) PeerJ 9:e11311 https://doi.org/10.7717/peerj.11311
Semeniuta (2021)	PeerJ Computer Science	–	Yes	No	None	Semeniuta O. 2021. Subset-based stereo calibration method optimizing triangulation accuracy. PeerJ Computer Science 7:e485 https://doi.org/10.7717/peerj-cs.485
Vergara et al. (2021)	PeerJ	Plant Biology	Yes	No	None	Vergara D, Feathers C, Huscher EL, Holmes B, Haas JA, Kane NC. 2021. Widely assumed phenotypic associations in Cannabis sativa lack a shared genetic basis. PeerJ 9:e10672 https://doi.org/10.7717/peerj.10672
Villa et al. (2021)	PeerJ Computer Science	–	No	–	–	Villa A, Mundanad Narayanan A, Van Huffel S, Bertrand A, Varon C. 2021. Utility metric for unsupervised feature selection. PeerJ Computer Science 7:e477 https://doi.org/10.7717/peerj-cs.477
Torkey et al. (2021)	PeerJ Computer Science	–	Yes	No	None	Torkey H, Atlam M, El-Fishawy N, Salem H. 2021. A novel deep autoencoder based survival analysis approach for microarray dataset. PeerJ Computer Science 7:e492 https://doi.org/10.7717/peerj-cs.492
Acharya et al. (2021)	PeerJ	Microbiology	Yes	Yes	Cumulative variance (65.8%)	Acharya M, Ashworth AJ, Yang Y, Burke JM, Lee JA, Sharma Acharya R. 2021. Soil microbial diversity in organic and non-organic pasture systems. PeerJ 9:e11184 https://doi.org/10.7717/peerj.11184
Price et al. (2021)	PeerJ	Biodiversity & Conservation	Yes	No	None	Price MR, Hadfield MG, Knapp ISS, Toonen RJ, Forsman ZH. 2021. Evolutionary genomics of endangered Hawaiian tree snails (Achatinellidae: Achatinellinae) for conservation of adaptive capacity. PeerJ 9:e10993 https://doi.org/10.7717/peerj.10993
Kranas et al. (2021)	PeerJ	Bioinformatics & Genomics	Yes	No	None	Kranas H, Tuszynska I, Wilczynski B. 2021. HiCEnterprise: identifying long range chromosomal contacts in Hi-C data. PeerJ 9:e10558 https://doi.org/10.7717/peerj.10558
Zhang et al. (2021)	PeerJ	Bioinformatics & Genomics	Yes	No	None	Zhang D, Yan P, Han T, Cheng X, Li J. 2021. Identification of key genes and biological processes contributing to colitis associated dysplasia in ulcerative colitis. PeerJ 9:e11321 https://doi.org/10.7717/peerj.11321
Al-yousif et al. (2021)	PeerJ Computer Science	–	Yes	No	None	Al-yousif S, Jaenul A, Al-Dayyeni W, Alamoodi A, Najm I, Md Tahir N, Alrawi AAA, Cömert Z, Al-shareefi NA, Saleh AH. 2021. A systematic review of automated pre-processing, feature extraction and classification of cardiotocography. PeerJ Computer Science 7:e452 https://doi.org/10.7717/peerj-cs.452
Diazgranados et al. (2021)	PeerJ	Ecology	Yes	Yes	Cumulative variance (86%)	Diazgranados M, Tovar C, Etherington TR, Rodríguez-Zorro PA, Castellanos-Castro C, Galvis Rueda M, Flantua SGA. 2021. Ecosystem services show variable responses to future climate conditions in the Colombian páramos. PeerJ 9:e11370 https://doi.org/10.7717/peerj.11370
Yang et al. (2021)	PeerJ	–	Yes	No	None	Yang Y, Huang Z, Yang Z, Qi Y, Shi H, Zhou Y, Wang F, Yang M. 2021. Serum metabolomic profiling reveals an increase in homocitrulline in Chinese patients with nonalcoholic fatty liver disease: a retrospective study. PeerJ 9:e11346 https://doi.org/10.7717/peerj.11346
Usmani & Shamsi (2021)	PeerJ Computer Science	–	No	–	–	Usmani S, Shamsi JA. 2021. News sensitive stock market prediction: literature review and suggestions. PeerJ Computer Science 7:e490 https://doi.org/10.7717/peerj-cs.490
Dar et al. (2021)	PeerJ	Microbiology	Yes	Yes	Eigenvalue > 1	Dar MA, Shaikh AF, Pawar KD, Xie R, Sun J, Kandasamy S, Pandit RS. 2021. Evaluation of cellulose degrading bacteria isolated from the gut-system of cotton bollworm, Helicoverpa armigera and their potential values in biomass conversion. PeerJ 9:e11254 https://doi.org/10.7717/peerj.11254
Ramasamy et al. (2021)	PeerJ Computer Science	–	No	–	–	Ramasamy LK, Padinjappurathu SG, Kadry S, Damaševičius R. 2021. Detection of diabetic retinopathy using a fusion of textural and ridgelet features of retinal images and sequential minimal optimization classifier. PeerJ Computer Science 7:e456 https://doi.org/10.7717/peerj-cs.456
Scavezzoni (2021)	PeerJ	Paleontology & Evolutionary Science	No	–	–	Scavezzoni I, Fischer V. 2021. The postcranial skeleton of Cerrejonisuchus improcerus (Crocodyliformes: Dyrosauridae) and the unusual anatomy of dyrosaurids. PeerJ 9:e11222 https://doi.org/10.7717/peerj.11222
Huang et al. (2021)	PeerJ	–	Yes	Yes	Eigenvalue > 1	Huang C(, Wilson K, Neylon C, Ozaygen A, Montgomery L, Hosking R. 2021. Mapping open knowledge institutions: an exploratory analysis of Australian universities. PeerJ 9:e11391 https://doi.org/10.7717/peerj.11391
Więclaw et al. (2021)	PeerJ	Plant Biology	Yes	No	None	Więcław H, Szenejko M, Kull T, Sotek Z, Rębacz-Maron E, Koopman J. 2021. Morphological variability and genetic diversity in Carex buxbaumii and Carex hartmaniorum (Cyperaceae) populations. PeerJ 9:e11372 https://doi.org/10.7717/peerj.11372
Etienne et al. (2021)	PeerJ	Zoological Science	No	–	–	Etienne C, Houssaye A, Hutchinson JR. 2021. Limb myology and muscle architecture of the Indian rhinoceros Rhinoceros unicornis and the white rhinoceros Ceratotherium simum (Mammalia: Rhinocerotidae) PeerJ 9:e11314 https://doi.org/10.7717/peerj.11314
Konstantinov et al. (2021)	PeerJ	Plant Biology	Yes	No	None	Konstantinov DK, Zubairova US, Ermakov AA, Doroshkov AV. 2021. Comparative transcriptome profiling of a resistant vs susceptible bread wheat (Triticum aestivum L.) cultivar in response to water deficit and cold stress. PeerJ 9:e11428 https://doi.org/10.7717/peerj.11428
Alhaithloul et al. (2021)	PeerJ	Plant Biology	Yes	No	None	Alhaithloul HAS, Galal FH, Seufi AM. 2021. Effect of extreme temperature changes on phenolic, flavonoid contents and antioxidant activity of tomato seedlings (Solanum lycopersicum L.) PeerJ 9:e11193 https://doi.org/10.7717/peerj.11193
Zablocki-Thomas et al. (2021)	PeerJ	Ecology	Yes	Yes	Cumulative variance (87%)	Zablocki-Thomas PB, Boulinguez-Ambroise G, Pacou C, Mézier J, Herrel A, Aujard F, Pouydebat E. 2021. Exploring the behavioral reactions to a mirror in the nocturnal grey mouse lemur: sex differences in avoidance. PeerJ 9:e11393 https://doi.org/10.7717/peerj.11393
Orozco-Arias et al. (2021)	PeerJ	Bioinformatics & Genomics	Yes	Yes	Cumulative variance (96%)	Orozco-Arias S, Candamil-Cortés MS, Jaimes PA, Piña JS, Tabares-Soto R, Guyot R, Isaza G. 2021. K-mer-based machine learning method to classify LTR-retrotransposons in plant genomes. PeerJ 9:e11456 https://doi.org/10.7717/peerj.11456
Iqbal et al. (2021)	PeerJ Computer Science	–	Yes	No	None	Iqbal N, Mumtaz R, Shafi U, Zaidi SMH. 2021. Gray level co-occurrence matrix (GLCM) texture based crop classification using low altitude remote sensing platforms. PeerJ Computer Science 7:e536 https://doi.org/10.7717/peerj-cs.536
Huang et al. (2021)	PeerJ	Bioinformatics & Genomics	Yes	No	None	Huang Y, Yi T, Liu Y, Yan M, Peng X, Lv Y. 2021. The landscape of tumors-infiltrate immune cells in papillary thyroid carcinoma and its prognostic value. PeerJ 9:e11494 https://doi.org/10.7717/peerj.11494
Shrestha et al. (2021)	PeerJ Computer Science	–	No	–	–	Shrestha AK, Vassileva J, Joshi S, Just J. 2021. Augmenting the technology acceptance model with trust model for the initial adoption of a blockchain-based system. PeerJ Computer Science 7:e502 https://doi.org/10.7717/peerj-cs.502
Huckstep et al. (2021)	PeerJ	Bioinformatics & Genomics	No	–	–	Huckstep H, Fearnley LG, Davis MJ. 2021. Measuring pathway database coverage of the phosphoproteome. PeerJ 9:e11298 https://doi.org/10.7717/peerj.11298
Turkoglu et al. (2021)	PeerJ Computer Science	–	Yes	No	None	Turkoglu M, Aslan M, Arı A, Alçin ZM, Hanbay D. 2021. A multi-division convolutional neural network-based plant identification system. PeerJ Computer Science 7:e572 https://doi.org/10.7717/peerj-cs.572
Seabra et al. (2021)	PeerJ	Zoological Science	Yes	No	None	Seabra SG, Rodrigues ASB, Silva SE, Neto AC, Pina-Martins F, Marabuto E, Thompson V, Wilson MR, Yurtsever S, Halkka A, Rebelo MT, Borges PAV, Quartau JA, Jiggins CD, Paulo OS. 2021. Population structure, adaptation and divergence of the meadow spittlebug, Philaenus spumarius (Hemiptera, Aphrophoridae), revealed by genomic and morphological data. PeerJ 9:e11425 https://doi.org/10.7717/peerj.11425
Ajduković et al. (2021)	PeerJ	Zoological Science	Yes	No	None	Ajduković M, Vučić T, Cvijanović M. 2021. Effects of thiourea on the skull of Triturus newts during ontogeny. PeerJ 9:e11535 https://doi.org/10.7717/peerj.11535
Li et al. (2021)	PeerJ	Bioinformatics & Genomics	Yes	No	None	Li Q, Lai Y, Gao X, Li X, Deng C, Guo H, Zhao J, Yang H, Xu Y, Wu S, Xue Y, Rao F. 2021. Involvement of plasminogen activator inhibitor-1 and its related molecules in atrial fibrosis in patients with atrial fibrillation. PeerJ 9:e11488 https://doi.org/10.7717/peerj.11488
Wang et al. (2021)	PeerJ	Plant Biology	Yes	No	None	Wang J, Liang C, Yang S, Song J, Li X, Dai X, Wang F, Juntawong N, Tan F, Zhang X, Jiao C, Zou X, Chen W. 2021. iTRAQ-based quantitative proteomic analysis of heat stress-induced mechanisms in pepper seedlings. PeerJ 9:e11509 https://doi.org/10.7717/peerj.11509
Cancellare et al. (2021)	PeerJ	Ecology	No	–	–	Cancellare IA, Kierepka EM, Janecka J, Weckworth B, Kazmaier RT, Ward R. 2021. Multiscale patterns of isolation by ecology and fine-scale population structure in Texas bobcats. PeerJ 9:e11498 https://doi.org/10.7717/peerj.11498
Li et al. (2021)	PeerJ Computer Science	–	No	–	–	Li H, Feng A, Lin B, Su H, Liu Z, Duan X, Pu H, Wang Y. 2021. A novel method for credit scoring based on feature transformation and ensemble model. PeerJ Computer Science 7:e579 https://doi.org/10.7717/peerj-cs.579
Caballero et al. (2021)	PeerJ Computer Science	–	No	–	–	Caballero D, Pérez-Palacios T, Caro A, Ávila M, Antequera T. 2021. Optimization of the image acquisition procedure in low-field MRI for non-destructive analysis of loin using predictive models. PeerJ Computer Science 7:e583 https://doi.org/10.7717/peerj-cs.583
Alsenan et al. (2021)	PeerJ Computer Science	–	No	–	–	Alsenan S, Al-Turaiki I, Hafez A. 2021. A deep learning approach to predict blood-brain barrier permeability. PeerJ Computer Science 7:e515 https://doi.org/10.7717/peerj-cs.515
Lin et al. (2021)	PeerJ	Biochemistry, Biophysics & Molecular Biology	Yes	No	None	Lin W, Chen H, Wang J, Zheng Y, Lu Q, Zhu Z, Li N, Jin Z, Li J, Lu H. 2021. Transcriptome analysis associated with polysaccharide synthesis and their antioxidant activity in Cyclocarya paliurus leaves of different developmental stages. PeerJ 9:e11615 https://doi.org/10.7717/peerj.11615
El Sayed et al. (2021)	PeerJ	Plant Biology	Yes	No	None	El Sayed MAA, Kheir AMS, Hussein FA, Ali EF, Selim ME, Majrashi A, El Shamey EAZ. 2021. Developing new lines of Japonica rice for higher quality and yield under arid conditions. PeerJ 9:e11592 https://doi.org/10.7717/peerj.11592
Kindt (2021)	PeerJ	Bioinformatics & Genomics	Yes	No	None	Kindt R. 2021. AlleleShift: an R package to predict and visualize population-level changes in allele frequencies in response to climate change. PeerJ 9:e11534 https://doi.org/10.7717/peerj.11534
Ahmad et al. (2021)	PeerJ	Microbiology	Yes	No	None	Ahmad AA, Zhang JB, Liang Z, Yang C, Kalwar Q, Shah T, Du M, Muhammad I, Zheng J, Yan P, Ding X, Long R. 2021. Dynamics of rumen bacterial composition of yak (Bos grunniens) in response to dietary supplements during the cold season. PeerJ 9:e11520 https://doi.org/10.7717/peerj.11520
Tomar et al. (2021)	PeerJ	Plant Biology	Yes	No	None	Tomar V, Dhillon GS, Singh D, Singh RP, Poland J, Joshi AK, Tiwari BS, Kumar U. 2021. Elucidating SNP-based genetic diversity and population structure of advanced breeding lines of bread wheat (Triticum aestivum L.) PeerJ 9:e11593 https://doi.org/10.7717/peerj.11593
Gao et al. (2021)	PeerJ	Plant Biology	Yes	No	None	Gao J, Chen T, Jiang C, Wang T, Huang O, Zhang X, Liu J. 2021. Comparative anatomical and transcriptomic analyses of the color variation of leaves in Aquilaria sinensis. PeerJ 9:e11586 https://doi.org/10.7717/peerj.11586
Wang et al. (2021)	PeerJ	Zoological Science	Yes	No	None	Wang X, Yan P, Feng S, Luo Y, Liang J, Zhao L, Liu H, Tang Q, Long K, Jin L, Ma J, Jiang A, Shuai S, Li M. 2021. Identification and expression pattern analysis of miRNAs in pectoral muscle during pigeon (Columba livia) development. PeerJ 9:e11438 https://doi.org/10.7717/peerj.11438
Sobral-Souza et al. (2021)	PeerJ	Biodiversity & Conservation	Yes	No	None	Sobral-Souza T, Stropp J, Santos JP, Prasniewski VM, Szinwelski N, Vilela B, Freitas AVL, Ribeiro MC, Hortal J. 2021. Knowledge gaps hamper understanding the relationship between fragmentation and biodiversity loss: the case of Atlantic Forest fruit-feeding butterflies. PeerJ 9:e11673 https://doi.org/10.7717/peerj.11673
Zhang et al. (2021)	PeerJ	Plant Biology	No	–	–	Zhang Y, Liu P, Wang C, Zhang N, Zhu Y, Zou C, Yuan G, Yang C, Gao S, Pan G, Ma L, Shen Y. 2021. Genome-wide association study uncovers new genetic loci and candidate genes underlying seed chilling-germination in maize. PeerJ 9:e11707 https://doi.org/10.7717/peerj.11707
Li et al. (2021)	PeerJ	Biochemistry, Biophysics & Molecular Biology	Yes	No	None	Li B, Chen S, Wang C, Chen Q, Man C, An Q, Zhang Z, Liu Z, Du L, Wang F. 2021. Integrated mRNA-seq and miRNA-seq analysis of goat fibroblasts response to Brucella Melitensis strain M5-90. PeerJ 9:e11679 https://doi.org/10.7717/peerj.11679
Park et al. (2021)	PeerJ	Plant Biology	Yes	No	None	Park BK, Son DC, Ghimire B. 2021. Taxonomic relevance of petiole anatomical and micro-morphological characteristics of Clematis L. (Ranunculaceae) taxa from South Korea. PeerJ 9:e11669 https://doi.org/10.7717/peerj.11669
Bicknell et al. (2021)	PeerJ	Paleontology & Evolutionary Science	Yes	Yes	Cumulative variance (75.6%)	Bicknell RDC, Shcherbakov DE. 2021. New austrolimulid from Russia supports role of Early Triassic horseshoe crabs as opportunistic taxa. PeerJ 9:e11709 https://doi.org/10.7717/peerj.11709
Yang et al. (2021)	PeerJ	Plant Biology	Yes	No	None	Yang Z, Xie C, Huang Y, An W, Liu S, Huang S, Zheng X. 2021. Metabolism and transcriptome profiling provides insight into the genes and transcription factors involved in monoterpene biosynthesis of borneol chemotype of Cinnamomum camphora induced by mechanical damage. PeerJ 9:e11465 https://doi.org/10.7717/peerj.11465
Bakoev et al. (2021)	PeerJ	Zoological Science	Yes	No	None	Bakoev S, Getmantseva L, Kostyunina O, Bakoev N, Prytkov Y, Usatov A, Tatarinova TV. 2021. Genome-wide analysis of genetic diversity and artificial selection in Large White pigs in Russia. PeerJ 9:e11595 https://doi.org/10.7717/peerj.11595
Silva-Junior et al. (2021)	PeerJ Computer Science	–	Yes	No	None	Silva Junior D, Pacitti E, Paes A, de Oliveira D. 2021. Provenance-and machine learning-based recommendation of parameter values in scientific workflows. PeerJ Computer Science 7:e606 https://doi.org/10.7717/peerj-cs.606
Tu et al. (2021)	PeerJ	Bioinformatics & Genomics	Yes	No	None	Tu G, Peng W, Cai Q, Zhao Z, Peng X, He B, Zhang P, Shi S, Tao Y, Wang X. 2021. Construction and validation of a 15-gene ferroptosis signature in lung adenocarcinoma. PeerJ 9:e11687 https://doi.org/10.7717/peerj.11687
Gao et al. (2021)	PeerJ	Bioinformatics & Genomics	Yes	No	None	Gao X, Tang M, Tian S, Li J, Liu W. 2021. Identification of a circadian gene signature that predicts overall survival in lung adenocarcinoma. PeerJ 9:e11733 https://doi.org/10.7717/peerj.11733
Almanjahie et al. (2021)	PeerJ	Environmental Science	No	–	–	Almanjahie IM, Kaid Z, Laksaci A, Rachdi M. 2021. Predicting temperature curve based on fast kNN local linear estimation of the conditional distribution function. PeerJ 9:e11719 https://doi.org/10.7717/peerj.11719
Schaduangrat et al. (2021)	PeerJ	Bioinformatics & Genomics	Yes	No	None	Schaduangrat N, Malik AA, Nantasenamat C. 2021. ERpred: a web server for the prediction of subtype-specific estrogen receptor antagonists. PeerJ 9:e11716 https://doi.org/10.7717/peerj.11716
Hedrick (2021)	PeerJ	Zoological Science	Yes	Yes	Cumulative variance (72 and 63.1%)	Hedrick BP. 2021. Inter- and intraspecific variation in the Artibeus species complex demonstrates size and shape partitioning among species. PeerJ 9:e11777 https://doi.org/10.7717/peerj.11777
Yang et al. (2021)	PeerJ	Bioinformatics & Genomics	Yes	No	None	Yang C, Huang S, Cao F, Zheng Y. 2021. Role of ferroptosis-related genes in prognostic prediction and tumor immune microenvironment in colorectal carcinoma. PeerJ 9:e11745 https://doi.org/10.7717/peerj.11745
Kakar et al. (2021)	PeerJ	Plant Biology	Yes	No	None	Kakar N, Bheemanahalli R, Jumaa S, Redoña E, Warburton ML, Reddy KR. 2021. Assessment of agro-morphological, physiological and yield traits diversity among tropical rice. PeerJ 9:e11752 https://doi.org/10.7717/peerj.11752
Humayun et al. (2021)	PeerJ Computer Science	–	Yes	No	None	Humayun MA, Yassin H, Abas PE. 2021. Spatial position constraint for unsupervised learning of speech representations. PeerJ Computer Science 7:e650 https://doi.org/10.7717/peerj-cs.650
Bakoev et al. (2021)	PeerJ	Bioinformatics & Genomics	Yes	No	None	Bakoev S, Traspov A, Getmantseva L, Belous A, Karpushkina T, Kostyunina O, Usatov A, Tatarinova TV. 2021. Detection of genomic regions associated malformations in newborn piglets: a machine-learning approach. PeerJ 9:e11580 https://doi.org/10.7717/peerj.11580
Zhang et al. (2021)	PeerJ	Environmental Science	Yes	Yes	Eigenvalue > 1	Zhang X, Wu Q, Gao S, Wang Z, He S. 2021. Distribution, source, water quality and health risk assessment of dissolved heavy metals in major rivers in Wuhan, China. PeerJ 9:e11853 https://doi.org/10.7717/peerj.11853
Biggs et al. (2021)	PeerJ	Aquatic Biology	Yes	No	None	Biggs CR, Heyman WD, Farmer NA, Kobara S, Bolser DG, Robinson J, Lowerre-Barbieri SK, Erisman BE. 2021. The importance of spawning behavior in understanding the vulnerability of exploited marine fishes in the U.S. Gulf of Mexico. PeerJ 9:e11814 https://doi.org/10.7717/peerj.11814
Xu et al. (2021)	PeerJ	Environmental Science	No	–	–	Xu P, Chen B, Zhang J, Xue L, Zhu L. 2021. A new HSI denoising method via interpolated block matching 3D and guided filter. PeerJ 9:e11642 https://doi.org/10.7717/peerj.11642
Liew et al. (2021)	PeerJ	Ecology	Yes	No	None	Liew T, Phung C, Mat Said MA, Hoo PK. 2021. Distribution and abundance of the land snail Pollicaria elephas (Gastropoda: Pupinidae) in limestone habitats in Perak, Malaysia. PeerJ 9:e11886 https://doi.org/10.7717/peerj.11886
Lyu et al. (2021)	PeerJ	Environmental Science	Yes	No	None	Lyu Q, Shen Y, Li X, Chen G, Li D, Fan C. 2021. Early effects of crop tree management on undergrowth plant diversity and soil physicochemical properties in a Pinus massoniana plantation. PeerJ 9:e11852 https://doi.org/10.7717/peerj.11852
Garibay-Valdez et al. (2021)	PeerJ	Microbiology	Yes	No	None	Garibay-Valdez E, Cicala F, Martinez-Porchas M, Gómez-Reyes R, Vargas-Albores F, Gollas-Galván T, Martínez-Córdova LR, Calderón K. 2021. Longitudinal variations in the gastrointestinal microbiome of the white shrimp, Litopenaeus vannamei. PeerJ 9:e11827 https://doi.org/10.7717/peerj.11827
Zulqarnain et al. (2021)	PeerJ Computer Science	–	No	–	–	Zulqarnain M, Khalaf Zager Alsaedi A, Ghazali R, Ghouse MG, Sharif W, Aida Husaini N. 2021. A comparative analysis on question classification task based on deep learning approaches. PeerJ Computer Science 7:e570 https://doi.org/10.7717/peerj-cs.570
Cai et al. (2021)	PeerJ	Bioinformatics & Genomics	Yes	No	None	Cai J, Li C, Li H, Wang X, Zhou Y. 2021. Establishment of a ferroptosis-related gene signature for prognosis in lung adenocarcinoma patients. PeerJ 9:e11931 https://doi.org/10.7717/peerj.11931
Li et al. (2021)	PeerJ	Plant Biology	Yes	No	None	Li S, Wang H, Jin L, White JF, Kingsley KL, Gou W, Cui L, Wang F, Wang Z, Wu G. 2021. Validation and analysis of the geographical origin of Angelica sinensis (Oliv.) Diels using multi-element and stable isotopes. PeerJ 9:e11928 https://doi.org/10.7717/peerj.11928
Yánez-Muñoz et al. (2021)	PeerJ	Biodiversity & Conservation	Yes	Yes	Eigenvalue > 1	Yánez-Muñoz MH, Reyes-Puig JP, Batallas-Revelo D, Broaddus C, Urgilés-Merchán M, Cisneros-Heredia DF, Guayasamin JM. 2021. A new Andean treefrog (Amphibia: Hyloscirtus bogotensis group) from Ecuador: an example of community involvement for conservation. PeerJ 9:e11914 https://doi.org/10.7717/peerj.11914
Liu et al. (2021)	PeerJ	Bioinformatics & Genomics	Yes	No	None	Liu X, Shen Y, Zhang Y, Liu F, Ma Z, Yue Z, Yue Y. 2021. IdentPMP: identification of moonlighting proteins in plants using sequence-based learning models. PeerJ 9:e11900 https://doi.org/10.7717/peerj.11900
Xue et al. (2021)	PeerJ	Plant Biology	No	–	–	Xue D, Liu H, Wang D, Gao Y, Jia Z. 2021. Comparative transcriptome analysis of R3a and Avr3a-mediated defense responses in transgenic tomato. PeerJ 9:e11965 https://doi.org/10.7717/peerj.11965
Abbasi et al. (2021)	PeerJ	Plant Biology	Yes	No	None	Abbasi AZ, Bilal M, Khurshid G, Yiotis C, Zeb I, Hussain J, Baig A, Shah MM, Chaudhary SU, Osborne B, Ahmad R. 2021. Expression of cyanobacterial genes enhanced CO2 assimilation and biomass production in transgenic Arabidopsis thaliana. PeerJ 9:e11860 https://doi.org/10.7717/peerj.11860
Mori et al. (2021)	PeerJ	Aquatic Biology	Yes	No	None	Mori F, Umezawa Y, Kondo R, Nishihara GN, Wada M. 2021. Potential oxygen consumption and community composition of sediment bacteria in a seasonally hypoxic enclosed bay. PeerJ 9:e11836 https://doi.org/10.7717/peerj.11836
Huang et al. (2021)	PeerJ	Bioinformatics & Genomics	Yes	No	None	Huang L, Lin L, Fu X, Meng C. 2021. Development and validation of a novel survival model for acute myeloid leukemia based on autophagy-related genes. PeerJ 9:e11968 https://doi.org/10.7717/peerj.11968
Collado et al. (2021)	PeerJ	Zoological Science	Yes	No	None	Collado GA, Chihuailaf E, Muñoz-Herrera N, Contreras M, Novoa F, Valladares MA. 2021. Reproductive aspects of the poorly known and critically endangered freshwater snail Heleobia atacamensis (Gastropoda: Truncatelloidea) PeerJ 9:e11550 https://doi.org/10.7717/peerj.11550
Cervantes et al. (2021)	PeerJ	Plant Biology	Yes	No	None	Cervantes S, Vuosku J, Pyhäjärvi T. 2021. Atlas of tissue-specific and tissue-preferential gene expression in ecologically and economically significant conifer Pinus sylvestris. PeerJ 9:e11781 https://doi.org/10.7717/peerj.11781
Doi & Hirai (2021)	PeerJ Computer Science	–	Yes	No	None	Doi H, Hirai T. 2021. Estimation of deracinated trees area in temperate forest with satellite images employing machine learning methods. PeerJ Computer Science 7:e648 https://doi.org/10.7717/peerj-cs.648
Messer et al. (2021)	PeerJ	Zoological Science	Yes	No	None	Messer D, Svendsen MS, Galatius A, Olsen MT, Dahl VA, Conradsen K, Dahl AB. 2021. Measurement error using a SeeMaLab structured light 3D scanner against a Microscribe 3D digitizer. PeerJ 9:e11804 https://doi.org/10.7717/peerj.11804
Chi et al. (2021)	PeerJ	Paleontology & Evolutionary Science	Yes	No	None	Chi T, Gan Y, Yang T, Chang C. 2021. First report of leopard fossils from a limestone cave in Kenting area, southern Taiwan. PeerJ 9:e12020 https://doi.org/10.7717/peerj.12020
Nethathe et al. (2021)	PeerJ	Biochemistry, Biophysics & Molecular Biology	No	–	–	Nethathe B, Chipangura J, Hassan IZ, Duncan N, Adawaren EO, Havenga L, Naidoo V. 2021. Diclofenac toxicity in susceptible bird species results from a combination of reduced glomerular filtration and plasma flow with subsequent renal tubular necrosis. PeerJ 9:e12002 https://doi.org/10.7717/peerj.12002
Sun et al. (2021)	PeerJ	Plant Biology	Yes	No	None	Sun W, Chen D, Carballar-Lejarazu R, Yang Y, Xiang S, Qiu M, Zou S. 2021. Genetic diversity and population structure of Euscaphis japonica, a monotypic species. PeerJ 9:e12024 https://doi.org/10.7717/peerj.12024
Wang et al. (2021)	PeerJ	Bioinformatics & Genomics	Yes	No	None	Wang S, Wang L, Liu Y, Zhu Y, Liu Y. 2021. Characteristics of T-cell receptor repertoire of stem cell-like memory CD4+ T cells. PeerJ 9:e11987 https://doi.org/10.7717/peerj.11987
Shaw et al. (2021)	PeerJ	Microbiology	Yes	Yes	Cumulative variance (83.3%)	Shaw PJ, Piriyapongsa J, Kaewprommal P, Wongsombat C, Chaosrikul C, Teeravajanadet K, Boonbangyang M, Uthaipibull C, Kamchonwongpaisan S, Tongsima S. 2021. Identifying transcript 5′ capped ends in Plasmodium falciparum. PeerJ 9:e11983 https://doi.org/10.7717/peerj.11983
Matsuda (2021)	PeerJ	Biochemistry, Biophysics & Molecular Biology	Yes	No	None	Matsuda T. 2021. Importance of experimental information (metadata) for archived sequence data: case of specific gene bias due to lag time between sample harvest and RNA protection in RNA sequencing. PeerJ 9:e11875 https://doi.org/10.7717/peerj.11875
Smirnov et al. (2021)	PeerJ Computer Science	–	No	–	–	Smirnov Y, Smirnov D, Popov A, Yakovenko S. 2021. Solving musculoskeletal biomechanics with machine learning. PeerJ Computer Science 7:e663 https://doi.org/10.7717/peerj-cs.663
Konvicka et al. (2021)	PeerJ	Ecology	Yes	No	None	Konvicka M, Kuras T, Liparova J, Slezak V, Horázná D, Klečka J, Kleckova I. 2021. Low winter precipitation, but not warm autumns and springs, threatens mountain butterflies in middle-high mountains. PeerJ 9:e12021 https://doi.org/10.7717/peerj.12021
Wang et al. (2021)	PeerJ	Zoological Science	Yes	No	None	Wang Y, Chang Y, Du Y. 2021. Transcriptome analysis reveals gene expression differences in Liriomyza trifolii exposed to combined heat and abamectin exposure. PeerJ 9:e12064 https://doi.org/10.7717/peerj.12064
Shastri et al. (2021)	PeerJ	Bioinformatics & Genomics	No	–	–	Shastri AA, Ahuja K, Ratnaparkhe MB, Busnel Y. 2021. Probabilistically sampled and spectrally clustered plant species using phenotypic characteristics. PeerJ 9:e11927 https://doi.org/10.7717/peerj.11927
Guo et al. (2021)	PeerJ	Plant Biology	Yes	Yes	Eigenvalue > 1	Guo J, Bai X, Shi W, Li R, Hao X, Wang H, Gao Z, Guo J, Lin W. 2021. Risk assessment of freezing injury during overwintering of wheat in the northern boundary of the Winter Wheat Region in China. PeerJ 9:e12154 https://doi.org/10.7717/peerj.12154
Li et al. (2021)	PeerJ	Plant Biology	Yes	No	None	Li Z, Wan L, Li S, Li X, He F, Tong Z. 2021. Plastic response of Medicago sativa L. root system traits and cold resistance to simulated rainfall events. PeerJ 9:e11962 https://doi.org/10.7717/peerj.11962
Goh & Khang (2021)	PeerJ Computer Science	–	Yes	Yes	Cumulative variance (92.6%)	Goh JY, Khang TF. 2021. On the classification of simple and complex biological images using Krawtchouk moments and Generalized pseudo-Zernike moments: a case study with fly wing images and breast cancer mammograms. PeerJ Computer Science 7:e698 https://doi.org/10.7717/peerj-cs.698
Glimm et al. (2021)	PeerJ	Zoological Science	Yes	No	None	Glimm T, Kiskowski M, Moreno N, Chiari Y. 2021. Capturing and analyzing pattern diversity: an example using the melanistic spotted patterns of leopard geckos. PeerJ 9:e11829 https://doi.org/10.7717/peerj.11829
Ruiz-Santiago et al. (2021)	PeerJ	Plant Biology	Yes	Yes	Eigenvalue > 1	Ruiz-Santiago RR, Ballina-Gómez HS, Ruiz-Sánchez E, Martínez-Castillo J, Garruña-Hernández R, Andueza-Noh RH. 2021. Determining relevant traits for selecting landrace accessions of Phaseolus lunatus L. for insect resistance. PeerJ 9:e12088 https://doi.org/10.7717/peerj.12088
Bose et al. (2021)	PeerJ Computer Science	–	No	–	–	Bose S, Das C, Banerjee A, Ghosh K, Chattopadhyay M, Chattopadhyay S, Barik A. 2021. An ensemble machine learning model based on multiple filtering and supervised attribute clustering algorithm for classifying cancer samples. PeerJ Computer Science 7:e671 https://doi.org/10.7717/peerj-cs.671
Paskerova et al. (2021)	PeerJ	Biodiversity & Conservation	Yes	No	None	Paskerova GG, Miroliubova TS, Valigurová A, Janouškovec J, Kováčiková M, Diakin A, Sokolova YY, Mikhailov KV, Aleoshin VV, Simdyanov TG. 2021. Evidence from the resurrected family Polyrhabdinidae Kamm, 1922 (Apicomplexa: Gregarinomorpha) supports the epimerite, an attachment organelle, as a major eugregarine innovation. PeerJ 9:e11912 https://doi.org/10.7717/peerj.11912
Kumar et al. (2021)	PeerJ Computer Science	–	No	–	–	Kumar SA, Nasralla MM, García-Magariño I, Kumar H. 2021. A machine-learning scraping tool for data fusion in the analysis of sentiments about pandemics for supporting business decisions with human-centric AI explanations. PeerJ Computer Science 7:e713 https://doi.org/10.7717/peerj-cs.713
Bitard-Feildel (2021)	PeerJ Computer Science	–	Yes	No	None	Bitard-Feildel T. 2021. Navigating the amino acid sequence space between functional proteins using a deep learning framework. PeerJ Computer Science 7:e684 https://doi.org/10.7717/peerj-cs.684
Rachmatullah et al. (2021)	PeerJ Computer Science	–	Yes	Yes	Cumulative variance (90%)	Rachmatullah MIC, Santoso J, Surendro K. 2021. Determining the number of hidden layer and hidden neuron of neural network for wind speed prediction. PeerJ Computer Science 7:e724 https://doi.org/10.7717/peerj-cs.724
Ahmed et al. (2021)	PeerJ Computer Science	–	No	–	–	Ahmed H, Alarabi L, El-Sappagh S, Soliman H, Elmogy M. 2021. Genetic variations analysis for complex brain disease diagnosis using machine learning techniques: opportunities and hurdles. PeerJ Computer Science 7:e697 https://doi.org/10.7717/peerj-cs.697
Pereira et al. (2021)	PeerJ	Aquatic Biology	Yes	No	None	Pereira RC, Nocchi N, Konno TUP, Soares AR. 2021. Diverse traits of aquatic plants cannot individually explain their consumption by the generalist gastropod Biomphalairia glabrata. PeerJ 9:e12031 https://doi.org/10.7717/peerj.12031
Song et al. (2021)	PeerJ	Bioinformatics & Genomics	Yes	No	None	Song Y, Nie L, Zhang Y. 2021. LncRNAs specifically overexpressed in endocervical adenocarcinoma are associated with an unfavorable recurrence prognosis and the immune response. PeerJ 9:e12116 https://doi.org/10.7717/peerj.12116
Islam et al. (2021)	PeerJ	Biochemistry, Biophysics & Molecular Biology	Yes	Yes	Cumulative variance (71.9%)	Islam MK, Vinsen K, Sostaric T, Lim LY, Locher C. 2021. Detection of syrup adulterants in manuka and jarrah honey using HPTLC-multivariate data analysis. PeerJ 9:e12186 https://doi.org/10.7717/peerj.12186
Durrer et al. (2021)	PeerJ	Plant Biology	Yes	No	None	Durrer A, Gumiere T, Rumenos Guidetti Zagatto M, Petry Feiler H, Miranda Silva AM, Henriques Longaresi R, Homma SK, Cardoso EJBN. 2021. Organic farming practices change the soil bacteria community, improving soil quality and maize crop yields. PeerJ 9:e11985 https://doi.org/10.7717/peerj.11985
Konishi (2021)	PeerJ	Bioinformatics & Genomics	Yes	No	None	Konishi T. 2021. Effect of control measures on the pattern of COVID-19 Epidemics in Japan. PeerJ 9:e12215 https://doi.org/10.7717/peerj.12215
Rico et al. (2021)	PeerJ	Plant Biology	Yes	No	None	Rico Y, León-Tapia MÁ, Zurita-Solís M, Rodríguez-Gómez F, Vásquez-Morales SG. 2021. Influence of Pleistocene climatic oscillations on the phylogeography and demographic history of endemic vulnerable trees (section Magnolia) of the Tropical Montane Cloud Forest in Mexico. PeerJ 9:e12181 https://doi.org/10.7717/peerj.12181
Kinard et al. (2021)	PeerJ	Aquatic Biology	Yes	No	None	Kinard S, Patrick CJ, Carvallo F. 2021. Effects of a natural precipitation gradient on fish and macroinvertebrate assemblages in coastal streams. PeerJ 9:e12137 https://doi.org/10.7717/peerj.12137
Tran & Might (2021)	PeerJ	Bioinformatics & Genomics	No	–	–	Tran D, Might M. 2021. cdev: a ground-truth based measure to evaluate RNA-seq normalization performance. PeerJ 9:e12233 https://doi.org/10.7717/peerj.12233
Michel-Rodriguez et al. (2021)	PeerJ	Aquatic Biology	Yes	No	None	Michel-Rodriguez M, Lefebvre S, Crouvoisier M, Mériaux X, Lizon F. 2021. Underwater light climate and wavelength dependence of microalgae photosynthetic parameters in a temperate sea. PeerJ 9:e12101 https://doi.org/10.7717/peerj.12101
Li et al. (2021)	PeerJ	Environmental Science	Yes	No	None	Li Y, Shen Y, Wang T. 2021. Freezing and thawing cycles affect nitrous oxide emissions in rain-fed lucerne (Medicago sativa) grasslands of different ages. PeerJ 9:e12216 https://doi.org/10.7717/peerj.12216
Schagen et al. (2021)	PeerJ	Microbiology	Yes	No	None	Schagen M, Bosch J, Johnson J, Duker R, Lebre P, Potts AJ, Cowan DA. 2021. The soil microbiomics of intact, degraded and partially-restored semi-arid succulent thicket (Albany Subtropical Thicket) PeerJ 9:e12176 https://doi.org/10.7717/peerj.12176
Aftab et al. (2021)	PeerJ Computer Science	–	No	–	–	Aftab A, Khan FA, Khan MK, Abbas H, Iqbal W, Riaz F. 2021. Hand-based multibiometric systems: state-of-the-art and future challenges. PeerJ Computer Science 7:e707 https://doi.org/10.7717/peerj-cs.707
Reddy et al. (2021)	PeerJ	Plant Biology	Yes	Yes	Eigenvalue > 1	Reddy VRP, Dikshit HK, Mishra GP, Aski M, Singh A, Bansal R, Pandey R, Nair RM. 2021. Comparison of different selection traits for identification of phosphorus use efficient lines in mungbean. PeerJ 9:e12156 https://doi.org/10.7717/peerj.12156
Wu et al. (2021)	PeerJ	Bioinformatics & Genomics	Yes	No	None	Wu Z, Chen L, Jin C, Xu J, Zhang X, Yao Y. 2021. A novel pyroptosis-associated gene signature for immune status and prognosis of cutaneous melanoma. PeerJ 9:e12304 https://doi.org/10.7717/peerj.12304
Joshi et al. (2021)	PeerJ	Plant Biology	Yes	No	None	Joshi V, Nimmakayala P, Song Q, Abburi V, Natarajan P, Levi A, Crosby K, Reddy UK. 2021. Genome-wide association study and population structure analysis of seed-bound amino acids and total protein in watermelon. PeerJ 9:e12343 https://doi.org/10.7717/peerj.12343
Kerniske et al. (2021)	PeerJ	Aquatic Biology	Yes	No	None	Kerniske FF, Pena Castro J, De la Ossa-Guerra LE, Mayer BA, Abilhoa V, de Paiva Affonso I, Ferreira Artoni R. 2021. Spinal malformations in a naturally isolated Neotropical fish population. PeerJ 9:e12239 https://doi.org/10.7717/peerj.12239
Fenetahun et al. (2021)	PeerJ	Ecology	Yes	No	None	Fenetahun Y, You Y, Fentahun T, Xinwen X, Yong-dong W. 2021. Effects of grazing intensity on forage nutritive value of dominant grass species in Borana rangelands of Southern Ethiopia. PeerJ 9:e12204 https://doi.org/10.7717/peerj.12204
Shegelski et al. (2021)	PeerJ	Zoological Science	Yes	No	None	Shegelski VA, Evenden ML, Huber DPW, Sperling FAH. 2021. Identification of genes and gene expression associated with dispersal capacity in the mountain pine beetle, Dendroctonus ponderosae Hopkins (Coleoptera: Curculionidae) PeerJ 9:e12382 https://doi.org/10.7717/peerj.12382
Ke et al. (2021)	PeerJ	Bioinformatics & Genomics	Yes	No	None	Ke P, Qian L, Zhou Y, Feng L, Zhang Z, Zheng C, Chen M, Huang X, Wu X. 2021. Identification of hub genes and transcription factor-miRNA-mRNA pathways in mice and human renal ischemia-reperfusion injury. PeerJ 9:e12375 https://doi.org/10.7717/peerj.12375
Mao et al. (2021)	PeerJ	Bioinformatics & Genomics	Yes	No	None	Mao Y, Lv X, Xu W, Ying Y, Qin Z, Liao H, Chen L, Liu Y. 2021. Identification and validation of candidate genes dysregulated in alveolar macrophages of acute respiratory distress syndrome. PeerJ 9:e12312 https://doi.org/10.7717/peerj.12312
Morozowska et al. (2021)	PeerJ	Plant Biology	Yes	Yes	Eigenvalue > 1	Morozowska M, Woźnicka A, Nowińska R. 2021. The morphology and internal structure of dogwood (Cornus L.) endocarps in the taxonomy and phylogeny of the genus. PeerJ 9:e12170 https://doi.org/10.7717/peerj.12170
Meng et al. (2021)	PeerJ	Biochemistry, Biophysics & Molecular Biology	Yes	No	None	Meng W, Xu D, Meng Y, Zhang W, Xue Y, Zhen Z, Gao Y. 2021. Changes in the urinary proteome in rats with regular swimming exercise. PeerJ 9:e12406 https://doi.org/10.7717/peerj.12406
Orlova et al. (2021)	PeerJ	Aquatic Biology	Yes	No	None	Orlova SY, Rastorguev S, Bagno T, Kurnosov D, Nedoluzhko A. 2021. Genetic structure of marine and lake forms of Pacific herring Clupea pallasii. PeerJ 9:e12444 https://doi.org/10.7717/peerj.12444
Charwudzi et al. (2021)	PeerJ	Bioinformatics & Genomics	No	–	–	Charwudzi A, Meng Y, Hu L, Ding C, Pu L, Li Q, Xu M, Zhai Z, Xiong S. 2021. Integrated bioinformatics analysis reveals dynamic candidate genes and signaling pathways involved in the progression and prognosis of diffuse large B-cell lymphoma. PeerJ 9:e12394 https://doi.org/10.7717/peerj.12394
Tyagi & Bhide (2021)	PeerJ	Bioinformatics & Genomics	No	–	–	Tyagi P, Bhide M. 2021. Development of a bioinformatics platform for analysis of quantitative transcriptomics and proteomics data: the OMnalysis. PeerJ 9:e12415 https://doi.org/10.7717/peerj.12415
Wala et al. (2021)	PeerJ	Plant Biology	Yes	No	None	Wala M, Kołodziejek J, Mazur J, Cienkowska A. 2021. Reactions of two xeric-congeneric species of Centaurea (Asteraceae) to soils with different pH values and iron availability. PeerJ 9:e12417 https://doi.org/10.7717/peerj.12417
Bharti et al. (2021)	PeerJ	Bioinformatics & Genomics	Yes	No	None	Bharti N, Banerjee R, Achalere A, Kasibhatla SM, Joshi R. 2021. Genetic diversity of ‘Very Important Pharmacogenes’ in two South-Asian populations. PeerJ 9:e12294 https://doi.org/10.7717/peerj.12294
Xu et al. (2021)	PeerJ Computer Science	–	Yes	No	None	Xu L, Sun Z, Wen X, Huang Z, Chao C, Xu L. 2021. Using machine learning analysis to interpret the relationship between music emotion and lyric features. PeerJ Computer Science 7:e785 https://doi.org/10.7717/peerj-cs.785
Varola et al. (2021)	PeerJ	Zoological Science	Yes	Yes	Eigenvalue > 1	Varola M, Verga L, Sroka MGU, Villanueva S, Charrier I, Ravignani A. 2021. Can harbor seals (Phoca vitulina) discriminate familiar conspecific calls after long periods of separation? PeerJ 9:e12431 https://doi.org/10.7717/peerj.12431
Heron et al. (2021)	PeerJ	–	Yes	No	None	Heron E, McArdle A, Karim MN, Cooper M, Geddes D, McKenna L. 2021. Construct validity and internal consistency of the Breast Inflammatory Symptom Severity Index in lactating mothers with inflammatory breast conditions. PeerJ 9:e12439 https://doi.org/10.7717/peerj.12439
Dorigo et al. (2021)	PeerJ	Ecology	Yes	No	None	Dorigo L, Boscutti F, Sigura M. 2021. Landscape and microhabitat features determine small mammal abundance in forest patches in agricultural landscapes. PeerJ 9:e12306 https://doi.org/10.7717/peerj.12306
Fukalova et al. (2021)	PeerJ	Biochemistry, Biophysics & Molecular Biology	Yes	No	None	Fukalova Fukalova T, García Martínez MD, Raigón MD. 2021. Five undervalued edible species inherent to autumn-winter season: nutritional composition, bioactive constituents and volatiles profile. PeerJ 9:e12488 https://doi.org/10.7717/peerj.12488
Szczepocka et al. (2021)	PeerJ	Aquatic Biology	Yes	No	None	Szczepocka E, Nowicka-Krawczyk P, Olszyński R, Żelazna-Wieczorek J. 2021. Response of diatom assemblages to the disruption of the running water continuum in urban areas, and its consequences on bioassessment. PeerJ 9:e12457 https://doi.org/10.7717/peerj.12457
Komisarenko et al. (2021)	PeerJ	Aquatic Biology	Yes	No	None	Komisarenko A, Mordukhovich V, Ekimova I, Imbs A. 2021. A comparison of food sources of nudibranch mollusks at different depths off the Kuril Islands using fatty acid trophic markers. PeerJ 9:e12336 https://doi.org/10.7717/peerj.12336
Arteaga-Arteaga et al. (2021)	PeerJ Computer Science	–	Yes	No	None	Arteaga-Arteaga HB, Mora-Rubio A, Florez F, Murcia-Orjuela N, Diaz-Ortega CE, Orozco-Arias S, delaPava M, Bravo-Ortíz MA, Robinson M, Guillen-Rondon P, Tabares-Soto R. 2021. Machine learning applications to predict two-phase flow patterns. PeerJ Computer Science 7:e798 https://doi.org/10.7717/peerj-cs.798
Liu et al. (2021)	PeerJ	Bioinformatics & Genomics	Yes	Yes	Scree plot	Liu Y, Lu N, Bi C, Han T, Zhuojun G, Zhu Y, Li Y, He C, Lu Z. 2021. FEM: mining biological meaning from cell level in single-cell RNA sequencing data. PeerJ 9:e12570 https://doi.org/10.7717/peerj.12570
